# Supplementary material for: A pangenome analysis pipeline provides insights into functional gene identification in rice
Source: Genome Biol. 2023 Jan 26;24:19. doi: 10.1186/s13059-023-02861-9 (PMC9878884; doi:10.1186/s13059-023-02861-9)
Supplement: Supplementary file 2 — Additional file 2: Supplemental tables 1-25. [file 13059_2023_2861_MOESM2_ESM.xlsx]

## Sheet: Table S1
Table S1: Assembled genomes of 12 cultivated accessions for pangenome construction
Accession	Length (Mb)	Gene number	Subpopulation	Percentage in pan-genome	PAV counts	New genes in pan-genome	Contig N50 (Mb)	BUSCO Completeness score (%)
Nipponbare	373.1	41096	GJ-tmp	0.8572	NA	NA	7.7	NA
Lemont	379.9	39479	GJ-trp	0.017	3312	224	6.5	96.3
NamRoo	378	41293	GJ-sbtrp	0.0091	1678	136	5.3	96.4
LJ	371.7	38981	GJ-adm	0.0044	1072	65	14.9	96.5
CN1	391.5	42047	XI-1A	0.0333	5452	536	17.7	96.1
R498	390.2	43063	XI-1B	0.0145	1970	164	25.6	95.1
TM	390.9	40082	XI-2	0.0117	1647	129	23	95.9
TUMBA	391.5	41554	XI-3	0.0092	1246	111	12.8	95.9
FH838	392.9	37555	XI-adm	0.007	688	68	15.1	88
N22	385.5	38383	cA	0.0138	2008	167	21.5	90.1
Basmati1	380.1	42098	cB	0.0094	1438	141	9.8	96
CG14	344.7	38031	O.glaberrima	0.0132	4074	198	14.6	96.1

## Sheet: Table S2
Table S2: GO enrichment of newly inserted genes.
GO term	Description	FDR P-value
GO:0015979	photosynthesis	1.5e-06
GO:0006091	generation of precursor metabolites and energy	0.00021

## Sheet: Table S3
Table S3. Characterization of Insertion in pan-genome construction
	Our pangenome	MH63KL1	3K rice pangenome
Contigs	12	12	24
Total length	435429075	395765488	666783978
N50	35225103	31921180	31582279
GC (%)	0.4423	0.4365	43.39
Complete BUSCOs	0.988	0.987	0.98
Complete and single-copy BUSCOs	0.964	0.962	0.903
Complete and duplicate BUSCOs	0.024	0.025	0.077
Fragmented BUSCOs	0.003	0.003	0.001
Missing BUSCOs	0.009	0.01	0.019

## Sheet: Table S4
Table S4. Sequencing data of 3k using for PAV calling
3K_DNA_IRIS_UNIQUE_ID	Genetic_Stock_Accession	Genetic_Stock_varname	Genetic_Stock_varname_Synonym	IRGC_VARNAME_source	Other_VARNAME_source	IRGC_Accno_source	Other_Collection_Name	Country_Origin_supplied	Country_Origin_updated	Region_of_Origin	K9_group_Admixture	Mapping_depth
IRIS_313-11924	IRGC 128400	NAM JAM::IRGC 75069-1		NAM JAM		IRGC 75069		Thailand	Thailand	SEA	GJ-sbtrp	63.9369
IRIS_313-11669	IRGC 131986	F 478::IRGC 63882-1				IRGC 63882		China	China	EAS	XI-adm	57.4894
IRIS_313-11802	IRGC 127460	JIE CAO ZHAN::IRGC 70305-1		JIE CAO ZHAN		IRGC 70305		China	China	EAS	XI-1A	53.1159
IRIS_313-11801	IRGC 127368	FAN WU::IRGC 70245-1		FAN WU		IRGC 70245		China	China	EAS	XI-adm	48.1349
IRIS_313-11671	IRGC 127313	DERAWA::IRGC 64106-1		DERAWA		IRGC 64106		Nepal	Nepal	SAC	XI-2	47.9466
IRIS_313-11812	IRGC 127175	ASFALA::IRGC 70650-1		ASFALA		IRGC 70650		Kenya	Kenya	EAF	XI-3	46.5701
IRIS_313-11723	IRGC 127320	DISSIGBE::IRGC 66916-1		DISSIGBE		IRGC 66916		Guinea	Guinea	WAF	XI-2	46.3395
IRIS_313-11796	IRGC 127345	DU GEN CHUAN::IRGC 70083-1		DU GEN CHUAN		IRGC 70083		China	China	EAS	XI-1A	45.7329
IRIS_313-8326	IRGC 117494	JC 1::IRGC 9091-1		JC 1		IRGC 9091		India	India	SAC	cB (Bas)	43.07
IRIS_313-11800	IRGC 136098	FAN GENG 6::IRGC 70243-1		FAN GENG 6		IRGC 70243		China	China	EAS	GJ-tmp	42.2036
IRIS_313-11805	IRGC 127895	XI HONG GU::IRGC 70416-1		XI HONG GU		IRGC 70416		China	China	EAS	XI-1A	41.4825
IRIS_313-11722	IRGC 128327	KABERI::IRGC 66801-1		KABERI		IRGC 66801		Bangladesh	Bangladesh	SAE	XI-adm	41.2019
IRIS_313-11665	IRGC 127464	JIN HUA 258::IRGC 63670-1		JIN HUA 258		IRGC 63670		China	China	EAS	XI-1A	40.9077
IRIS_313-11635	IRGC 128294	GAM PERNG::IRGC 62135-1		GAM PERNG		IRGC 62135		Thailand	Thailand	SEA	XI-3	40.6428
IRIS_313-11657	NA	EX WUKARI (WILD)::IRGC 63214-1		EX WUKARI(WILD)		IRGC 63214		Nigeria	Nigeria	WAF	XI-2	40.6365
IRIS_313-11646	IRGC 127665	NCS 771 A::IRGC 62483-1		NCS771 A		IRGC 62483		India	India	SAC	XI-2	40.5093
IRIS_313-11098	IRGC 134993	KOLUBA::IRGC 30463-3		KOLUBA		IRGC 30463		Sierra Leone	Sierra Leone	WAF	XI-3	40.375
IRIS_313-11668	IRGC 127771	RONG DAO 4::IRGC 63820-1		RONG DAO 4		IRGC 63820		China	China	EAS	XI-1A	40.1233
IRIS_313-11656	IRGC 127196	B 3913 B 16-20 ST 28::IRGC 63099-1		B 3913 B 16-20 ST 28		IRGC 63099		Indonesia	Indonesia	SER	XI-adm	39.9272
IRIS_313-11794	IRGC 127867	TSIPALA MENAHAR::IRGC 69979-1		TSIPALA MENAHAR		IRGC 69979		Madagascar	Madagascar	IOC	XI-2	39.8944
IRIS_313-11717	IRGC 127450	JATI MANI::IRGC 66565-1		JATI MANI		IRGC 66565		Indonesia	Indonesia	SER	XI-adm	39.8212
IRIS_313-11645	IRGC 127664	NCS 766::IRGC 62478-1		NCS766		IRGC 62478		India	India	SAC	XI-2	39.6181
IRIS_313-11664	IRGC 127288	CUN GU NUO::IRGC 63576-1		CUN GU NUO		IRGC 63576		China	China	EAS	XI-adm	39.6157
IRIS_313-11821	IRGC 127096	19::IRGC 70786-1		19		IRGC 70786		India	India	SAC	XI-2	39.5622
IRIS_313-11681	IRGC 132426	KHAO' PAWM::IRGC 64416-2		KHAO' PAWM		IRGC 64416		Thailand	Thailand	SEA	XI-3	39.3608
IRIS_313-11643	IRGC 127662	NCS 603 B::IRGC 62377-1		NCS603 B		IRGC 62377		India	India	SAC	XI-1B	39.3076
IRIS_313-11710	IRGC 134992	LEUANG MAI::IRGC 66019-2		LEUANG MAI		IRGC 66019		Thailand	Thailand	SEA	XI-3	38.7852
IRIS_313-11686	IRGC 132366	QUAHNG LUANG::IRGC 64609-2		QUAHNG LUANG		IRGC 64609		Thailand	Thailand	SEA	XI-3	38.6185
IRIS_313-10177	IRGC 125719	DA GANG ZHAN::IRGC 67103-1		DA GANG ZHAN		IRGC 67103		China	China	EAS	XI-adm	38.3471
IRIS_313-11731	IRGC 127754	QING TAI AI::IRGC 67273-1		QING TAI AI		IRGC 67273		China	China	EAS	XI-adm	37.9018
IRIS_313-10858	IRGC 127131	ARC 10894::IRGC 21122-1		ARC 10894		IRGC 21122		India	India	SAC	XI-adm	37.7954
IRIS_313-9066	IRGC 125659	AUS 177::IRGC 29009-1		AUS 177		IRGC 29009		Bangladesh	Bangladesh	SAE	XI-1B	37.7692
IRIS_313-11819	IRGC 132362	PADINTHUMA::IRGC 70762-2		PADINTHUMA		IRGC 70762		Myanmar	Myanmar	SEA	XI-3	37.7084
IRIS_313-11736	IRGC 127595	MALAGKIT (PINELIPE)::IRGC 67444-1		MALAGKIT(PINELIPE)		IRGC 67444		Philippines	Philippines	SER	GJ-trp	37.6886
IRIS_313-11651	IRGC 128291	FEI ZHAO 12::IRGC 62683-1		FEI ZHAO 12		IRGC 62683		China	China	EAS	GJ-tmp	37.4453
IRIS_313-11683	IRGC 127677	NIAW KHIAW NGOO::IRGC 64563-1		NIAW KHIAW NGOO		IRGC 64563		Thailand	Thailand	SEA	XI-3	37.4015
IRIS_313-8493	IRGC 128537	MELABOH::IRGC 66597-1		MELABOH		IRGC 66597		Indonesia	Indonesia	SER	XI-3	37.1625
IRIS_313-11825	IRGC 135753	HANSRAJ::IRGC 70836-3		HANSRAJ		IRGC 70836		India	India	SAC	cB (Bas)	36.704
IRIS_313-11730	IRGC 127753	QING ER XIAO 2::IRGC 67255-1		QING ER XIAO 2		IRGC 67255		China	China	EAS	XI-adm	36.6879
IRIS_313-11754	IRGC 128214	AMBOHIMANDAY::IRGC 68330-1		AMBOHIMANDAY		IRGC 68330		Madagascar	Madagascar	IOC	admix	36.6732
IRIS_313-11804	IRGC 128441	QUN XUAN ZAO::IRGC 70371-1		QUN XUAN ZAO		IRGC 70371		China	China	EAS	XI-1A	36.6627
IRIS_313-11740	IRGC 127872	UGAGA::IRGC 67604-1		UGAGA		IRGC 67604		Ghana	Ghana	WAF	XI-adm	36.5438
IRIS_313-8391	NA	MARAGBE::IRGC 69263-1		MARAGBE		IRGC 69263		Burkina Faso	Burkina Faso	WAF	XI-2	36.3857
IRIS_313-11673	IRGC 128248	BURI BURING::IRGC 64174-1		BURI-BURING		IRGC 64174		Philippines	Philippines	SER	GJ-trp	36.3712
IRIS_313-11755	IRGC 131961	A 2-257::IRGC 68342-1		A 2-257		IRGC 68342		Liberia	Liberia	WAF	GJ-trp	36.2916
IRIS_313-11759	IRGC 131995	K 2 C 45::IRGC 68552-1		K 2 C 45		IRGC 68552		Cote d'Ivoire	Cote d'Ivoire	WAF	GJ-trp	36.269
IRIS_313-11727	IRGC 127416	HONG YANG ZAO 3::IRGC 67177-1		HONG YANG ZAO 3		IRGC 67177		China	China	EAS	XI-1A	36.013
IRIS_313-11791	IRGC 127885	VARY LAHY::IRGC 69908-1		VARY LAHY		IRGC 69908		Madagascar	Madagascar	IOC	XI-2	35.9898
IRIS_313-11824	IRGC 127317	DHANIYA PHOOL::IRGC 70811-1		DHANIYA PHOOL		IRGC 70811		India	India	SAC	XI-2	35.9863
IRIS_313-11725	IRGC 128514	ZUIHOU::IRGC 66982-1		ZUIHOU		IRGC 66982		Japan	Japan	EAR	GJ-tmp	35.9263
IRIS_313-11687	IRGC 132297	SA GAE::IRGC 64613-1		SA GAE		IRGC 64613		Thailand	Thailand	SEA	XI-3	35.8921
IRIS_313-11752	IRGC 127584	M 6034-1::IRGC 68193-1		M 6034-1		IRGC 68193		China	China	EAS	XI-1A	35.7653
IRIS_313-11789	IRGC 127774	SABORAMANDALOAFO::IRGC 69875-1		SABORAMANDALOAFO		IRGC 69875		Madagascar	Madagascar	IOC	XI-2	35.691
IRIS_313-11797	IRGC 128289	E ZI 32::IRGC 70127-1		E ZI 32		IRGC 70127		China	China	EAS	XI-1A	35.6161
IRIS_313-11745	IRGC 127123	AN FU ZHAN::IRGC 67878-1		AN FU ZHAN		IRGC 67878		China	China	EAS	XI-1A	35.6113
B265	NA	Wukezhan	Wu Ke Zhan		乌壳占		MC	China	China	EAS	XI-adm	35.5101
IRIS_313-11691	IRGC 128467	SHANGYIPA::IRGC 64928-1		SHANGYIPA		IRGC 64928		Bhutan	Bhutan	SAE	GJ-sbtrp	35.1266
IRIS_313-11273	IRGC 127962	ARC 14860::IRGC 41793-2		ARC 14860		IRGC 41793		India	India	SAC	XI-adm	35.0765
IRIS_313-11711	IRGC 132295	RAI MAHK MEUANG::IRGC 66154-1		RAI MAHK MEUANG		IRGC 66154		Thailand	Thailand	SEA	XI-3	34.9195
IRIS_313-11744	IRGC 127114	AI JIAO AO FAN ZI::IRGC 67871-1		AI JIAO AO FAN ZI		IRGC 67871		China	China	EAS	XI-adm	34.772
IRIS_313-11786	IRGC 128411	N'YA NOFF::IRGC 69749-1		N'YA NOFF		IRGC 69749		Gambia	Gambia	WAF	XI-3	34.7714
IRIS_313-11700	IRGC 127306	DAW NOK KAEN::IRGC 65548-1		DAW NOK KAEN		IRGC 65548		Thailand	Thailand	SEA	XI-3	34.6634
IRIS_313-11689	IRGC 128275	DECHANGBYEO::IRGC 64858-1		DECHANGBYEO		IRGC 64858		Korea, Republic of	Korea, Republic of	EAR	GJ-tmp	34.6557
IRIS_313-11737	IRGC 127283	CHUNDI::IRGC 67486-1		CHUNDI		IRGC 67486		India	India	SAC	cA (Aus)	34.5932
IRIS_313-11728	IRGC 127581	LUO SI ZHAN::IRGC 67211-1		LUO SI ZHAN		IRGC 67211		China	China	EAS	XI-3	34.5797
IRIS_313-11685	IRGC 127735	PLAWNG SAENG::IRGC 64595-1		PLAWNG SAENG		IRGC 64595		Thailand	Thailand	SEA	XI-3	34.3225
IRIS_313-11761	IRGC 127683	NS 199::IRGC 68864-1		NS199		IRGC 68864		Cote d'Ivoire	Cote d'Ivoire	WAF	XI-2	34.2579
IRIS_313-11663	IRGC 128383	MARHARORA::IRGC 63511-1		MARHARORA		IRGC 63511		Zimbabwe	Zimbabwe	EAF	admix	33.8776
IRIS_313-11790	IRGC 127883	VARIRANGAHY::IRGC 69897-1		VARIRANGAHY		IRGC 69897		Madagascar	Madagascar	IOC	GJ-trp	33.8347
CX97	IRGC 135851	Budda					IRMBN	India	India	SAC	XI-1B	33.7804
IRIS_313-11810	IRGC 132036	PULURE::IRGC 70647-1		PULURE		IRGC 70647		Kenya	Kenya	EAF	XI-3	33.5735
IRIS_313-10852	IRGC 127169	ARC 7336::IRGC 20606-1		ARC 7336		IRGC 20606		India	India	SAC	cA (Aus)	33.4562
IRIS_313-11705	IRGC 127303	DAWK PUD KHAO::IRGC 65808-1		DAWK PUD KHAO		IRGC 65808		Thailand	Thailand	SEA	XI-3	33.0027
IRIS_313-11644	IRGC 127663	NCS 745::IRGC 62466-1		NCS745		IRGC 62466		India	India	SAC	XI-2	32.9066
IRIS_313-9294	IRGC 131929	AUS 78-62::IRGC 69456-1		AUS 78-62		IRGC 69456		Gambia	Gambia	WAF	XI-2	32.8502
IRIS_313-11823	IRGC 127223	BHU BHUSI::IRGC 70803-1		BHU BHUSI		IRGC 70803		India	India	SAC	XI-2	32.7484
IRIS_313-11661	IRGC 131960	91-382::IRGC 63464-1		91-382		IRGC 63464		Bhutan	Bhutan	SAE	GJ-tmp	32.6959
IRIS_313-11257	IRGC 127944	ARC 12757::IRGC 41095-2		ARC 12757		IRGC 41095		India	India	SAC	XI-adm	32.549
IRIS_313-11279	IRGC 127967	ARC 15455::IRGC 42040-2		ARC 15455		IRGC 42040		India	India	SAC	XI-adm	32.4335
IRIS_313-11817	IRGC 128085	KHAOSAING::IRGC 70746-2		KHAOSAING		IRGC 70746		Myanmar	Myanmar	SEA	XI-adm	32.3906
IRIS_313-11709	IRGC 132010	LEUANG KHAJAWN::IRGC 66014-1		LEUANG KHAJAWN		IRGC 66014		Thailand	Thailand	SEA	XI-3	32.3729
IRIS_313-11815	IRGC 127633	MOSHI::IRGC 70730-1		MOSHI		IRGC 70730		Kenya	Kenya	EAF	XI-3	32.3694
IRIS_313-11719	IRGC 127304	DAWK PUT::IRGC 66699-1		DAWK PUT		IRGC 66699		Thailand	Thailand	SEA	XI-3	32.3649
IRIS_313-11738	IRGC 127720	PAUNDRI::IRGC 67527-1		PAUNDRI		IRGC 67527		India	India	SAC	XI-2	32.3213
IRIS_313-11746	IRGC 127349	E 2070::IRGC 67981-1		E 2070		IRGC 67981		China	China	EAS	XI-1A	32.2435
IRIS_313-11692	IRGC 127273	CHIAYI WU-K'O::IRGC 64974-1		CHIAYI-WU-K'O		IRGC 64974		Taiwan	Taiwan	EAR	XI-1A	31.986
IRIS_313-11242	IRGC 128121	OR 117-8::IRGC 39680-2		OR117-8		IRGC 39680		India	India	SAC	XI-2	31.9825
IRIS_313-11102	NA	D 1-39::IRGC 30868-1				IRGC 30868		Liberia	Liberia	WAF	GJ-trp	31.9238
IRIS_313-8948	IRGC 126974	BUCAYAB::IRGC 44357-1		BUCAYAB		IRGC 44357		Philippines	Philippines	SER	XI-3	31.8913
IRIS_313-11721	IRGC 127372	GAEW DAENG::IRGC 66707-1		GAEW DAENG		IRGC 66707		Thailand	Thailand	SEA	XI-3	31.8009
B269	IRGC 136083	Yuefu	Koshifu		越富		MC	China	Japan	EAR	GJ-tmp	31.6767
B264	NA	Sanbaili	Sanbai Li		三百粒		MC	China	China	EAS	XI-1A	31.6541
IRIS_313-11239	IRGC 127978	B 737 G-KN-23-1::IRGC 39203-2		B 737G-KN-23-1		IRGC 39203		Indonesia	Indonesia	SER	XI-adm	31.6316
IRIS_313-11795	IRGC 127291	DA GU AI 7::IRGC 70075-1		DA GU AI 7		IRGC 70075		China	China	EAS	XI-1A	31.5207
IRIS_313-11814	IRGC 127523	KIKUBA::IRGC 70722-1		KIKUBA		IRGC 70722		Kenya	Kenya	EAF	XI-3	31.5197
IRIS_313-9020	IRGC 126983	LEUANG CHAIYAPHUM::IRGC 78266-1		LEUANG CHAIYAPHUM		IRGC 78266		Thailand	Thailand	SEA	XI-3	31.442
IRIS_313-11809	IRGC 128387	MHARAKA::IRGC 70612-1		MHARAKA		IRGC 70612		Kenya	Kenya	EAF	cA (Aus)	31.377
IRIS_313-11748	IRGC 127378	GAO JIAO YING GAN ZHAN::IRGC 68053-1		GAO JIAO YING GAN ZHAN		IRGC 68053		China	China	EAS	XI-adm	31.3718
IRIS_313-11039	IRGC 128093	KWANG LU AI 4::IRGC 28480-2		KWANG-LU-AI 4		IRGC 28480		China	China	EAS	XI-1A	31.3271
IRIS_313-11811	IRGC 127632	MOSHI::IRGC 70648-1		MOSHI		IRGC 70648		Kenya	Kenya	EAF	XI-2	31.2387
B208	NA	Lucaihao	Lu Cai Hao		陆财号		MC	China	China	EAS	XI-1A	31.1571
IRIS_313-11453	IRGC 127916	ZINYA KOLAMBA::IRGC 52402-1		ZINYA KOLAMBA		IRGC 52402		India	India	SAC	XI-2	31.0806
IRIS_313-11684	IRGC 132021	OB CHUEY::IRGC 64568-1		OB CHUEY		IRGC 64568		Thailand	Thailand	SEA	XI-3	31.033
IRIS_313-11762	IRGC 127682	NS 1515::IRGC 68947-1		NS1515		IRGC 68947		Madagascar	Madagascar	IOC	XI-2	30.9942
IRIS_313-11083	IRGC 132248	EA TIA::IRGC 29713-2		Ea tia		IRGC 29713		Lao People's Democratic Republic	Lao People's Democratic Republic	SEA	XI-3	30.9515
IRIS_313-11260	IRGC 127950	ARC 13591::IRGC 41177-2		ARC 13591		IRGC 41177		India	India	SAC	XI-adm	30.912
IRIS_313-11764	IRGC 127697	P 41::IRGC 68987-1		P 41		IRGC 68987		Liberia	Liberia	WAF	XI-3	30.8949
IRIS_313-11097	IRGC 127478	KALAGNON::IRGC 30335-1		KALAGNON		IRGC 30335		Philippines	Philippines	SER	XI-adm	30.855
IRIS_313-11058	IRGC 127188	AUS 329::IRGC 29116-1		AUS 329		IRGC 29116		Bangladesh	Bangladesh	SAE	cA (Aus)	30.8391
IRIS_313-10863	IRGC 127937	ARC 11322::IRGC 21315-2		ARC 11322		IRGC 21315		India	India	SAC	XI-2	30.7669
IRIS_313-11648	IRGC 127667	NCS 830::IRGC 62518-1		NCS830		IRGC 62518		India	India	SAC	XI-2	30.7428
IRIS_313-11704	NA	BAHN DAENG::IRGC 65771-1		BAHN DAENG		IRGC 65771		Thailand	Thailand	SEA	XI-3	30.6913
IRIS_313-10114	IRGC 125739	FACAGRO 64::IRGC 82059-1		FACAGRO 64		IRGC 82059		Burundi	Burundi	EAF	XI-2	30.6546
IRIS_313-11241	IRGC 128001	BR 116-3B-53::IRGC 39559-2		BR116-3B-53		IRGC 39559		Bangladesh	Bangladesh	SAE	XI-2	30.6535
IRIS_313-11707	IRGC 132403	KHAO SAHKORN::IRGC 65948-1		KHAO SAHKORN		IRGC 65948		Thailand	Thailand	SEA	XI-3	30.6427
IRIS_313-11652	IRGC 128303	GONG SHE 9::IRGC 62693-1		GONG SHE 9		IRGC 62693		China	China	EAS	GJ-tmp	30.4279
IRIS_313-11674	IRGC 131971	BEUA KAE::IRGC 64221-1		BEUA KAE		IRGC 64221		Thailand	Thailand	SEA	XI-3	30.3477
IRIS_313-11708	IRGC 127518	KHAO YAI GUANG::IRGC 65972-1		KHAO YAI GUANG		IRGC 65972		Thailand	Thailand	SEA	XI-3	30.3117
IRIS_313-11089	IRGC 127824	SRAU THMOR::IRGC 29904-1		SRAU THMOR		IRGC 29904		Cambodia	Cambodia	SEA	XI-3	30.2876
IRIS_313-11234	IRGC 127563	LIGUNGTUNG::IRGC 38786-1		LIGUNGTUNG		IRGC 38786		Philippines	Philippines	SER	XI-adm	30.2672
IRIS_313-11750	IRGC 127538	L 10595::IRGC 68109-1		L 10595		IRGC 68109		China	China	EAS	XI-adm	30.2339
IRIS_313-11813	IRGC 132372	ZERO::IRGC 70707-2		ZERO		IRGC 70707		Kenya	Kenya	EAF	XI-3	30.061
IRIS_313-9148	IRGC 125664	BADAL 1163::IRGC 32796-1		BADAL 1163		IRGC 32796		Bangladesh	Bangladesh	SAE	XI-2	29.9594
IRIS_313-11258	IRGC 127948	ARC 13502::IRGC 41126-2		ARC 13502		IRGC 41126		India	India	SAC	cB (Bas)	29.8934
IRIS_313-10609	IRGC 127612	MATHOLUWA::IRGC 8901-1		MATHOLUWA		IRGC 8901		Sri Lanka	Sri Lanka	IOC	XI-adm	29.8753
IRIS_313-10857	IRGC 127129	ARC 10825::IRGC 21082-1		ARC 10825		IRGC 21082		India	India	SAC	admix	29.8383
B214	NA	Xuanenchangtanqingzhan	Xuan En Chang Tan Qing Nian		宣恩长坛青粘		MC	China	China	EAS	XI-1B	29.8229
IRIS_313-11807	IRGC 127757	R 582::IRGC 70504-1		R 582		IRGC 70504		Colombia	Colombia	SAM	XI-adm	29.7672
B253	NA	Jiangnongzao 1 B	Jiang Nong Zao 1B		江农早1号B		MC	China	China	EAS	XI-adm	29.7131
IRIS_313-11053	IRGC 127183	AUS 282::IRGC 29072-1		AUS 282		IRGC 29072		Bangladesh	Bangladesh	SAE	cA (Aus)	29.6389
IRIS_313-11298	IRGC 127152	ARC 13544::IRGC 42743-1		ARC 13544		IRGC 42743		India	India	SAC	cA (Aus)	29.615
B001	IRGC 135900	Heibiao	Hei Biao		黑标		MC	China	China	EAS	GJ-tmp	29.5708
IRIS_313-12058	IRGC 132406	KUL REUSEI::IRGC 82308-1		KUL REUSEI		IRGC 82308		Cambodia	Cambodia	SEA	XI-3	29.5445
IRIS_313-11798	IRGC 127365	E ZI 100::IRGC 70192-1		E ZI 100		IRGC 70192		China	China	EAS	XI-1B	29.5159
IRIS_313-10582	IRGC 128440	QINOGNAS::IRGC 8135-1		QINOGNAS		IRGC 8135		Philippines	Philippines	SER	GJ-trp	29.4462
IRIS_313-11747	IRGC 127350	E 4197::IRGC 68004-1		E 4197		IRGC 68004		China	China	EAS	XI-adm	29.4388
IRIS_313-11052	IRGC 127182	AUS 278::IRGC 29068-1		AUS 278		IRGC 29068		Bangladesh	Bangladesh	SAE	cA (Aus)	29.4136
IRIS_313-11820	IRGC 127709	PAKISTANHMWE::IRGC 70763-1		PAKISTANHMWE		IRGC 70763		Myanmar	Myanmar	SEA	XI-3	29.3939
IRIS_313-11267	IRGC 127956	ARC 14358::IRGC 41523-2		ARC 14358(GOLD HULL)		IRGC 41523		India	India	SAC	XI-2	29.3106
IRIS_313-11758	IRGC 131987	FOFFI::IRGC 68438-1		FOFFI		IRGC 68438		Cote d'Ivoire	Cote d'Ivoire	WAF	XI-2	29.1792
IRIS_313-11659	IRGC 132047	TOBOHUN::IRGC 63433-1		TOBOHUN		IRGC 63433		Sierra Leone	Sierra Leone	WAF	GJ-trp	29.1297
IRIS_313-8703	IRGC 124432	DA 7::IRGC 5809-2		DA7		IRGC 5809		Bangladesh	Bangladesh	SAE	XI-2	29.1282
IRIS_313-10171	IRGC 125944	YA NONG ZAO 4::IRGC 63908-1		YA NONG ZAO 4		IRGC 63908		China	China	EAS	XI-1A	29.0751
IRIS_313-11760	IRGC 127623	MENAHARA 505::IRGC 68709-1		MENAHARA 505		IRGC 68709		Madagascar	Madagascar	IOC	XI-2	29.0571
B204	NA	Longhuamaohu	Long Hua Mao Hu		隆化毛葫		MC	China	China	EAS	GJ-tmp	29.0551
IRIS_313-11720	IRGC 127302	DAW 85::IRGC 66704-1		DAW 85		IRGC 66704		Thailand	Thailand	SEA	XI-3	29.0124
IRIS_313-11263	IRGC 127953	ARC 13919::IRGC 41313-2		ARC 13919		IRGC 41313		India	India	SAC	XI-adm	28.9636
IRIS_313-11716	IRGC 127822	SOSSOKA::IRGC 66478-1		SOSSOKA		IRGC 66478		Guinea	Guinea	WAF	XI-3	28.8255
IRIS_313-15908	IRGC 126955	COLOMBIA XXI::G1		COLOMBIA XXI				Colombia	Colombia	SAM	cA (Aus)	28.7469
IRIS_313-9023	IRGC 125715	CR 60-10::IRGC 15777-1		CR60-10		IRGC 15777		India	India	SAC	XI-adm	28.7416
IRIS_313-10850	IRGC 132244	ARC 7263::IRGC 20570-2		ARC 7263		IRGC 20570		India	India	SAC	admix	28.7319
IRIS_313-10918	IRGC 135803	T Q QI QINYUHAYUHA::IRGC 23342-3		T.Q.QI. QINYUHAYUHA		IRGC 23342		Philippines	Philippines	SER	GJ-trp	28.7245
CX109	IRGC 135876	Dacca 6					IRMBN	Philippines	India	SAC	GJ-adm	28.6797
IRIS_313-8312	IRGC 131932	BATU::IRGC 71508-1		BATU		IRGC 71508		Malaysia	Malaysia	SER	XI-3	28.5659
IRIS_313-10986	IRGC 128048	HALDI JAON::IRGC 26638-2		HALDI JAON		IRGC 26638		Bangladesh	Bangladesh	SAE	XI-2	28.549
IRIS_313-8305	IRGC 126289	URAIBOOL::IRGC 52785-1		URAIBOOL		IRGC 52785		India	India	SAC	XI-2	28.4914
IRIS_313-15910	IRGC 126956	CYPRESS::IRTP 19532-G1		CYPRESS				United States of America	United States of America	NAM	GJ-trp	28.4149
IRIS_313-11266	IRGC 127955	ARC 14347::IRGC 41517-2		ARC 14347		IRGC 41517		India	India	SAC	XI-adm	28.3636
IRIS_313-11046	NA	LALANGIT::IRGC 28715-1		LALANGIT		IRGC 28715		Malaysia	Malaysia	SER	GJ-trp	28.2991
IRIS_313-11191	IRGC 127763	RANRUWAN::IRGC 36360-1		RANRUWAN		IRGC 36360		Sri Lanka	Sri Lanka	IOC	cA (Aus)	28.2788
IRIS_313-10975	IRGC 136183	KOLA MUCHI::IRGC 26384-2		KOLA MUCHI		IRGC 26384		Bangladesh	Bangladesh	SAE	XI-2	28.2431
IRIS_313-8925	IRGC 125813	KURULUTUDU::IRGC 36304-1		KURULUTUDU		IRGC 36304		Sri Lanka	Sri Lanka	IOC	XI-2	28.2402
IRIS_313-10872	IRGC 132421	ARC 11802::IRGC 21662-2		ARC 11802		IRGC 21662		India	India	SAC	GJ-adm	28.0947
IRIS_313-11822	IRGC 135738	BHONDU PAREWA::IRGC 70802-3		BHONDU PAREWA		IRGC 70802		India	India	SAC	XI-2	28.0884
IRIS_313-11677	IRGC 128286	E NAWN KHAO::IRGC 64293-1		E-NAWN KHAO		IRGC 64293		Thailand	Thailand	SEA	XI-3	27.9774
IRIS_313-11118	IRGC 135797	SOC NAU (BIEN THE)::IRGC 32074-3		SOC NAU(BIEN THE)		IRGC 32074		Viet Nam	Viet Nam	SEA	XI-3	27.7853
IRIS_313-11642	IRGC 127661	NCS 599::IRGC 62373-1		NCS599		IRGC 62373		India	India	SAC	XI-2	27.6902
B210	NA	Nanxiongzaoyouzhan	Nan Xiong Zao You Zhan		南雄早油占		MC	China	China	EAS	XI-1A	27.6195
IRIS_313-11244	NA	W 1014-162::IRGC 39871-1		W 1014-162		IRGC 39871		India	India	SAC	XI-adm	27.5833
IRIS_313-11247	IRGC 132431	RP 1153-20-14::IRGC 40131-2		RP1153-20-14		IRGC 40131		India	India	SAC	XI-adm	27.5649
IRIS_313-10861	IRGC 127134	ARC 11276::IRGC 21278-1		ARC 11276		IRGC 21278		India	India	SAC	cA (Aus)	27.4819
IRIS_313-11245	IRGC 128151	RP 20-12::IRGC 40031-2		RP20-12		IRGC 40031		India	India	SAC	XI-adm	27.444
IRIS_313-11732	IRGC 127755	QING ZAO 3::IRGC 67281-1		QING ZAO 3		IRGC 67281		China	China	EAS	XI-1A	27.4091
IRIS_313-9262	IRGC 125785	JHODI BIRUN::IRGC 31812-1		JHODI BIRUN		IRGC 31812		Bangladesh	Bangladesh	SAE	XI-2	27.3628
IRIS_313-11085	IRGC 132273	KHAO HAE::IRGC 29773-3		Khao hae		IRGC 29773		Lao People's Democratic Republic	Lao People's Democratic Republic	SEA	XI-adm	27.3371
IRIS_313-11113	IRGC 128069	KAL SHULI::IRGC 31665-2		KAL SHULI		IRGC 31665		Bangladesh	Bangladesh	SAE	XI-2	27.2622
IRIS_313-11724	IRGC 127531	KONYAN::IRGC 66931-1		KONYAN		IRGC 66931		Guinea	Guinea	WAF	XI-3	27.2597
IRIS_313-11734	IRGC 127803	SI CHAO 1::IRGC 67335-1		SI CHAO 1		IRGC 67335		China	China	EAS	XI-1A	27.2009
IRIS_313-10603	IRGC 127871	UCP 122::IRGC 8794-1		UCP122		IRGC 8794		Bangladesh	Bangladesh	SAE	cA (Aus)	27.1851
IRIS_313-7914	IRGC 122115	IRAT 112::C1		IRAT 112				Cote d'Ivoire	Cote d'Ivoire	WAF	GJ-trp	27.1532
CX98	IRGC 135882	Doddabyranella					IRMBN	India	India	SAC	XI-2	27.0648
IRIS_313-10892	IRGC 127149	ARC 12920::IRGC 22450-1		ARC 12920		IRGC 22450		India	India	SAC	cA (Aus)	26.9551
IRIS_313-11103	IRGC 132329	D 1-147::IRGC 30894-2				IRGC 30894		Liberia	Liberia	WAF	GJ-trp	26.9512
IRIS_313-8864	IRGC 121069	NOROI::IRGC 31611-1		NOROI		IRGC 31611		Bangladesh	Bangladesh	SAE	cA (Aus)	26.7994
B097	NA	Jiienuo	Ji Xie Nuo		鸡血糯		MC	China	China	EAS	XI-adm	26.7769
IRIS_313-11151	IRGC 128035	E 21::IRGC 33929-2				IRGC 33929		Myanmar	Myanmar	SEA	XI-3	26.6366
IRIS_313-11251	IRGC 132340	IR 4500-5-1-1::IRGC 40552-2		IR 4500-5-1-1		IRGC 40552		Philippines	Philippines	SER-IRRI	XI-1B	26.6205
IRIS_313-11493	IRGC 127126	AR 133::IRGC 53942-1		AR 133		IRGC 53942		India	India	SAC	XI-adm	26.5868
IRIS_313-8911	NA	LEK::IRGC 40199-1		LEK		IRGC 40199		Thailand	Thailand	SEA	admix	26.5834
IRIS_313-11900	IRGC 128435	PLE LIA::IRGC 73562-1		PLE LIA		IRGC 73562		Thailand	Thailand	SEA	GJ-sbtrp	26.4567
CX389	IRGC 135960	Jinyuan 85			津原85		IRMBN	China	China	EAS	GJ-tmp	26.4515
IRIS_313-11057	IRGC 127187	AUS 308::IRGC 29096-1		AUS 308		IRGC 29096		Bangladesh	Bangladesh	SAE	cA (Aus)	26.4134
IRIS_313-11064	IRGC 132306	BORO 275::IRGC 29294-2		BORO 275		IRGC 29294		Bangladesh	Bangladesh	SAE	cA (Aus)	26.3822
IRIS_313-11751	IRGC 127539	L 10833::IRGC 68121-1		L 10833		IRGC 68121		China	China	EAS	XI-adm	26.3068
IRIS_313-10010	IRGC 125818	LALKA (LAL DHAN)::IRGC 64946-1		LALKA(LAL DHAN)		IRGC 64946		Fiji	Fiji	OCE	XI-2	26.2708
B012	IRGC 135815	2037 (Rajahamsal)					MC	India	India	SAC	XI-2	26.2627
IRIS_313-11205	IRGC 128075	KAZALSAIL::IRGC 37161-2		KAZALSAIL		IRGC 37161		Bangladesh	Bangladesh	SAE	XI-2	26.2526
IRIS_313-11757	IRGC 131972	BORIZINA 640::IRGC 68382-1		BORIZINA 640		IRGC 68382		Madagascar	Madagascar	IOC	XI-3	26.1714
B182	NA	Chimao	Akage		赤毛		MC	Japan	Japan	EAR	GJ-tmp	26.1161
IRIS_313-11667	IRGC 127580	LUO AI ZAO 3::IRGC 63730-1		LUO AI ZAO 3		IRGC 63730		China	China	EAS	XI-1A	26.0375
IRIS_313-11799	IRGC 127366	E ZI 110::IRGC 70201-1		E ZI 110		IRGC 70201		China	China	EAS	XI-1A	25.9691
CX225	IRGC 135938	IR 77298-14-1-2					IRMBN	Philippines	Philippines	SER-IRRI	XI-1B	25.9409
IRIS_313-10577	IRGC 128318	IFUGAO RICE::IRGC 8052-1		IFUGAO RICE		IRGC 8052		Philippines	Philippines	SER	GJ-trp	25.9251
IRIS_313-11753	IRGC 127894	XIANG CHANG ZAO::IRGC 68268-1		XIANG CHANG ZAO		IRGC 68268		China	China	EAS	XI-1A	25.8438
CX152	IRGC 135866	Cisadane					IRMBN	na	Indonesia	SER	XI-1B	25.8413
IRIS_313-11269	IRGC 127958	ARC 14632::IRGC 41650-2		ARC 14632		IRGC 41650		India	India	SAC	XI-adm	25.8413
CX155	IRGC 135979	Madhukar					IRMBN	India	India	SAC	XI-2	25.7053
B212	NA	Chikenuo	Chi Ke Nuo		赤壳糯		MC	China	China	EAS	GJ-tmp	25.6614
IRIS_313-8930	IRGC 125844	MUKKALA BAZAL::IRGC 77279-1		MUKKALA BAZAL		IRGC 77279		Bangladesh	Bangladesh	SAE	XI-1B	25.6386
CX99	IRGC 135883	Doddi					IRMBN	India	India	SAC	XI-2	25.577
CX10	IRGC 135890	Gang 46B			冈46B		IRMBN	China	China	EAS	XI-1A	25.5653
IRIS_313-10235	IRGC 125874	PSBRC 68::IRGC 99711-1		PSBRC68		IRGC 99711		Philippines	Philippines	SER-IRRI	XI-adm	25.5256
CX101	IRGC 135902	Hei Mi Chan					IRMBN	Taiwan	China	EAS	XI-1A	25.5181
IRIS_313-10097	IRGC 125830	MAEKJO::IRGC 77666-1		MAEKJO		IRGC 77666		Korea, Republic of	Korea, Republic of	EAR	GJ-tmp	25.4476
CX154	IRGC 135967	Khao Dawk Mali 105					IRMBN	Thailand	Thailand	SEA	XI-3	25.364
IRIS_313-10511	IRGC 128101	MACAN SAPAC::IRGC 5212-2		MACAN SAPAC		IRGC 5212		Philippines	Philippines	SER	XI-3	25.2405
IRIS_313-11295	IRGC 127137	ARC 11397::IRGC 42664-1		ARC 11397		IRGC 42664		India	India	SAC	admix	25.2332
IRIS_313-11277	IRGC 127157	ARC 15129::IRGC 41938-1		ARC 15129		IRGC 41938		India	India	SAC	cA (Aus)	25.2283
IRIS_313-11112	IRGC 128308	HIJOL DIGA::IRGC 31655-1		HIJOL DIGA		IRGC 31655		Bangladesh	Bangladesh	SAE	cA (Aus)	25.0073
IRIS_313-8407	NA	NACHIN ER 12::IRGC 14146-1		NACHIN ER 12		IRGC 14146		Malaysia	Malaysia	SER	XI-3	24.999
IRIS_313-10870	IRGC 131966	ARC 11768::IRGC 21630-1		ARC 11768		IRGC 21630		India	India	SAC	GJ-sbtrp	24.9657
CX147	NA	Seberang					IRMBN	na	Malaysia	SER	XI-adm	24.9463
B261	NA	Meihuanuo	Meihua Nuo		梅花糯		MC	China	China	EAS	XI-1A	24.9188
IRIS_313-11253	NA	SML CAMPONI::IRGC 40642-1		SML-CAMPONI		IRGC 40642		Surinam	Surinam	SAM	XI-adm	24.9143
IRIS_313-11289	IRGC 127971	ARC 18578::IRGC 42459-2		ARC 18578		IRGC 42459		India	India	SAC	cB (Bas)	24.8855
IRIS_313-7808	IRGC 122285	WAS 173-B-B-6-2-2::C1		WAS 173-B-B-6-2-2				Senegal	Senegal	WAF	XI-1B	24.8429
IRIS_313-9409	IRGC 131937	GUMPANGAR::IRGC 71524-1		GUMPANGAR		IRGC 71524		Malaysia	Malaysia	SER	XI-3	24.8141
IRIS_313-11739	IRGC 128398	NAKPUI::IRGC 67594-1		NAKPUI		IRGC 67594		Ghana	Ghana	WAF	GJ-trp	24.7863
IRIS_313-11229	IRGC 128171	STRAW 23-428::IRGC 38416-2		STRAW 23-428		IRGC 38416		Bangladesh	Bangladesh	SAE	XI-2	24.7809
IRIS_313-9590	IRGC 125799	KETAN SERANG::IRGC 14615-1		KETAN SERANG		IRGC 14615		Indonesia	Indonesia	SER	XI-3	24.7262
B015	IRGC 135963	Kahamu	Kaha Mu		卡哈姆		MC	Romania	Romania	EUR	XI-1A	24.7008
IRIS_313-11256	IRGC 127941	ARC 12411::IRGC 41047-2		ARC 12411		IRGC 41047		India	India	SAC	XI-adm	24.6144
CX578	NA	C21	C 21				IRMBN		Philippines	SER-IRRI	GJ-tmp	24.6084
CX401	NA	TOG 7291					IRMBN	Africa	Burkina Faso	WAF	XI-adm	24.5669
IRIS_313-11265	IRGC 132242	ARC 14150::IRGC 41435-2		ARC 14150		IRGC 41435		India	India	SAC	cA (Aus)	24.5578
B026	IRGC 136017	Padi Ladang Ase Polo Komek					MC	Indonesia	Indonesia	SER	XI-adm	24.5431
IRIS_313-11033	IRGC 128448	RATRIO::IRGC 28181-1		RATRIO		IRGC 28181		Pakistan	Pakistan	SAW	admix	24.5181
CX102	IRGC 136053	Tek Si Chut	Teksichut				IRMBN	Taiwan	Taiwan	EAR	XI-1A	24.4917
IRIS_313-11733	IRGC 127801	SHUANG BAI AI 2::IRGC 67309-1		SHUANG BAI AI 2		IRGC 67309		China	China	EAS	XI-1A	24.4408
IRIS_313-11395	IRGC 135755	INDO NO 13075::IRGC 48665-3				IRGC 48665		Indonesia	Indonesia	SER	XI-3	24.4123
IRIS_313-11202	IRGC 127920	4583::IRGC 36894-2		4583		IRGC 36894		China	China	EAS	GJ-tmp	24.4112
IRIS_313-10851	IRGC 132387	ARC 7296::IRGC 20585-1		ARC 7296		IRGC 20585		India	India	SAC	cB (Bas)	24.3593
CX150	IRGC 135865	Chorofa					IRMBN	Philippines	Philippines	SER-IRRI	XI-1B	24.3451
IRIS_313-11806	IRGC 127101	78 XUAN WU::IRGC 70475-1		78 XUAN WU		IRGC 70475		China	China	EAS	XI-1A	24.3163
B157	NA	88B					MC	China	China	EAS	XI-1A	24.2635
IRIS_313-11788	IRGC 127247	CANLUBANG::IRGC 69816-1		CANLUBANG		IRGC 69816		Philippines	Philippines	SER	GJ-adm	24.2561
IRIS_313-11094	IRGC 132274	MAK BOUAP::IRGC 30106-3		MAK BOUAP		IRGC 30106		Lao People's Democratic Republic	Lao People's Democratic Republic	SEA	GJ-sbtrp	24.2412
IRIS_313-10337	IRGC 125953	B 6149 F-MR-7::IRGC 117314-1		B 6149 F-MR-7		IRGC 117314		Indonesia	Indonesia	SER	XI-adm	24.228
IRIS_313-11787	IRGC 127845	TANDAKAY FINGO::IRGC 69793-1		TANDAKAY FINGO		IRGC 69793		Gambia	Gambia	WAF	XI-2	24.2088
IRIS_313-11741	IRGC 127407	HERATH BANDA::IRGC 67630-1		HERATH BANDA		IRGC 67630		Sri Lanka	Sri Lanka	IOC	XI-2	24.173
CX417	NA	BG143	Xa4+21 (BG143)		Xa4+21		IRMBN		Philippines	SER-IRRI	XI-1B	24.1722
CX3	IRGC 135848	BR 24	BR24				IRMBN	Bangladesh	Bangladesh	SAC	XI-1A	24.1386
IRIS_313-11047	IRGC 127977	AUS 84::IRGC 28947-2		AUS 84		IRGC 28947		Bangladesh	Bangladesh	SAE	cA (Aus)	24.1086
IRIS_313-9160	IRGC 125922	THIERNO BANDE::IRGC 16009-1		THIERNO BANDE		IRGC 16009		Senegal	Senegal	WAF	XI-3	24.0551
IRIS_313-11044	IRGC 128005	BUKU::IRGC 28683-2		BUKU		IRGC 28683		Malaysia	Malaysia	SER	GJ-trp	24.048
IRIS_313-8293	IRGC 132432	SAGNADE::IRGC 15801-1		SAGNADE		IRGC 15801		Senegal	Senegal	WAF	XI-3	24.0289
CX220	IRGC 135941	IRAT 109					IRMBN	Brazil	Cote d'Ivoire	WAF	GJ-trp	23.9585
IRIS_313-11784	IRGC 127619	MBEIMBEIHUN::IRGC 69730-1		MBEIMBEIHUN		IRGC 69730		Sierra Leone	Sierra Leone	WAF	XI-1B	23.9379
B162	NA	Baigedao	Bai Ge Dao		百歌稻		MC	China	China	EAS	GJ-tmp	23.9105
IRIS_313-11816	IRGC 127493	KARILETYONE::IRGC 70745-1		KARILETYONE		IRGC 70745		Myanmar	Myanmar	SEA	XI-adm	23.8603
IRIS_313-11048	IRGC 127178	AUS 171::IRGC 29004-1		AUS 171		IRGC 29004		Bangladesh	Bangladesh	SAE	cA (Aus)	23.8564
IRIS_313-8606	IRGC 131926	AC 13 (T 141)::IRGC 5456-1		AC13(T 141)		IRGC 5456			India	SAC	XI-3	23.8492
IRIS_313-11763	IRGC 127734	PJ 110::IRGC 68981-1		PJ110		IRGC 68981		Cameroon	Cameroon	WAF	XI-adm	23.8348
B018	IRGC 135827	American Huangkedao	Yellow Hull		美国黄壳稻		MC	United_States	United States of America	NAM	GJ-trp	23.8223
IRIS_313-11050	IRGC 127180	AUS 233::IRGC 29036-1		AUS 233		IRGC 29036		Bangladesh	Bangladesh	SAE	cA (Aus)	23.7475
CX317	IRGC 135992	MR 19					IRMBN	China	Malaysia	SER	GJ-tmp	23.7419
B004	IRGC 136031	Qiuguangtengxi 104	Akimitsu Fujikei 104		秋光 藤系104号		MC	Japan	Japan	EAR	GJ-tmp	23.6738
IRIS_313-10871	IRGC 127139	ARC 11777::IRGC 21639-1		ARC 11777		IRGC 21639		India	India	SAC	cA (Aus)	23.6619
IRIS_313-11756	IRGC 131970	BENGALI VAKAHANA 1448::IRGC 68370-1		BENGALI VAKAHANA 1448		IRGC 68370		Madagascar	Madagascar	IOC	GJ-trp	23.6442
B073	NA	Jinxibai2	Jin Xi Bai		金溪白		MC	China	China	EAS	XI-adm	23.6201
IRIS_313-10614	IRGC 128049	HAM MOON::IRGC 9135-2		HAM MOON		IRGC 9135		Hong Kong	Hong Kong	EAS	XI-adm	23.5843
IRIS_313-11516	IRGC 127437	IR 3839-1::IRGC 55946-1		IR 3839-1		IRGC 55946		Philippines	Philippines	SER-IRRI	XI-adm	23.5718
CX357	IRGC 136023	PSBRC 80	PSBRC80				IRMBN	Philippines	Philippines	SER-IRRI	XI-1B	23.5534
B160	NA	Shuiyuan 300Li	Shuiyuan 300 Li		水原300粒		MC	China	China	EAS	GJ-tmp	23.5434
IRIS_313-11051	IRGC 127181	AUS 242::IRGC 29040-1		AUS 242		IRGC 29040		Bangladesh	Bangladesh	SAE	cA (Aus)	23.523
CX112	IRGC 135893	Ginga					IRMBN	Japan	Japan	EAR	admix	23.519
B221	NA	Fanhaopi	Fan Hao Pi		饭毫皮		MC	China	China	EAS	XI-1A	23.4334
IRIS_313-10725	IRGC 128518	ERNEST::IRGC 15884-2		ERNEST		IRGC 15884		Senegal	Senegal	WAF	XI-adm	23.3434
B250	NA	Annongwangeng B	An Nong Wan Geng B		安农晚粳B		MC	China	China	EAS	GJ-tmp	23.3299
IRIS_313-11278	NA	ARC 15319::IRGC 42007-1		ARC 15319		IRGC 42007		India	India	SAC	XI-adm	23.3235
CX106	IRGC 136040	SAL BUI BAO					IRMBN	Vietnam	Viet Nam	SEA	GJ-trp	23.2867
IRIS_313-8725	IRGC 126262	PULUT BARAYA::IRGC 27393-1		PULUT BARAYA		IRGC 27393		Indonesia	Indonesia	SER	XI-3	23.2397
IRIS_313-10642	IRGC 128455	SACHIKAZE::IRGC 10891-1		SACHIKAZE		IRGC 10891		Japan	Japan	EAR	GJ-tmp	23.1786
IRIS_313-11066	IRGC 127381	GASMAL 339::IRGC 29333-1		GASMAL 339		IRGC 29333		Bangladesh	Bangladesh	SAE	admix	23.156
CX344	NA	Hexi 41			合系41号		IRMBN	China	China	EAS	GJ-tmp	23.0846
B216	NA	Hanmadao4	Han Ma Dao		旱麻稻		MC	China	China	EAS	XI-1A	23.0779
IRIS_313-8988	IRGC 125672	BANIKAT::IRGC 67720-1		BANIKAT		IRGC 67720		India	India	SAC	XI-2	23.0731
IRIS_313-10576	IRGC 127979	BAANYALOJOPOIHUN::IRGC 7928-2		BAANYALOJOPOIHUN		IRGC 7928		Sierra Leone	Sierra Leone	WAF	XI-2	23.0721
B190	NA	ITA 221					MC	Nigeria	Nigeria	WAF	GJ-trp	23.0235
B040	IRGC 135962	K 24					MC	Uganda	India	SAC	XI-adm	22.9836
IRIS_313-10605	IRGC 127348	DV 86::IRGC 8840-1		DV86		IRGC 8840		Bangladesh	Bangladesh	SAE	cA (Aus)	22.9805
B039	IRGC 135940	IRAT 10					MC	Ivory_Coast	Cote d'Ivoire	WAF	XI-adm	22.9553
CX353	IRGC 135860	CAU 1					IRMBN	China	Viet Nam	SEA	GJ-adm	22.9516
IRIS_313-11095	IRGC 128104	MAK EA NAM::IRGC 30131-2		Mak ea nam		IRGC 30131		Lao People's Democratic Republic	Lao People's Democratic Republic	SEA	XI-3	22.9173
CX273	NA	NONA BOKRA					IRMBN	India	India	SAC	XI-adm	22.8864
CX108	NA	Ziri					IRMBN	India	India	SAC	admix	22.8675
IRIS_313-11436	IRGC 127779	SAKAZELE (538)::IRGC 50880-1		SAKAZELE(538)		IRGC 50880		Cote d'Ivoire	Cote d'Ivoire	WAF	GJ-trp	22.8352
CX364	NA	42686					IRMBN	na	_no_info	na	XI-1B	22.7713
CX542	NA	RR2-6	RR 2-6				IRMBN	China	China	EAS	XI-adm	22.6726
IRIS_313-9602	IRGC 125765	HTA 22::IRGC 45827-1		HTA22		IRGC 45827		Thailand	Thailand	SEA	XI-adm	22.6542
IRIS_313-7902	IRGC 122101	IR 63380-16::C1		IR 63380-16				Philippines	Philippines	SER-IRRI	GJ-trp	22.6413
CX263	IRGC 136018	PADISENEMOK	PADI SENEMOK				IRMBN	na	Malaysia	SER	XI-adm	22.6005
IRIS_313-11345	IRGC 127891	WAGWAG::IRGC 44802-1		WAGWAG		IRGC 44802		Philippines	Philippines	SER	XI-adm	22.5936
IRIS_313-11104	IRGC 131978	D 3-102::IRGC 30972-1				IRGC 30972		Liberia	Liberia	WAF	GJ-trp	22.5364
CX111	IRGC 135894	Giza 14					IRMBN	Egypt	Egypt	NAF	GJ-trp	22.5276
IRIS_313-10814	IRGC 128163	SIBORAS::IRGC 18816-2		SIBORAS		IRGC 18816		Indonesia	Indonesia	SER	XI-3	22.5258
IRIS_313-11056	IRGC 127186	AUS 301::IRGC 29089-1		AUS 301		IRGC 29089		Bangladesh	Bangladesh	SAE	cA (Aus)	22.4913
IRIS_313-11878	IRGC 127203	BAI RI XIAN::IRGC 72588-1		BAI RI XIAN		IRGC 72588		China	China	EAS	XI-1A	22.4693
CX221	IRGC 136095	Zhongyouzao 81	Zhong You Zao 81		中优早81		IRMBN	China	China	EAS	XI-adm	22.4619
B081	IRGC 135901	Heidu 4	Hei Du 4		黑督 4		MC	China	China	EAS	XI-1A	22.4611
IRIS_313-11655	IRGC 127815	SI WAN 14::IRGC 63019-1		SI WAN 14		IRGC 63019		China	China	EAS	GJ-tmp	22.3657
IRIS_313-11037	IRGC 128211	421::IRGC 28458-1		421		IRGC 28458		Pakistan	Pakistan	SAW	cA (Aus)	22.3632
IRIS_313-11045	IRGC 128039	ENGKABANG::IRGC 28694-2		ENGKABANG		IRGC 28694		Malaysia	Malaysia	SER	GJ-trp	22.3506
IRIS_313-9067	IRGC 125681	BHOJON KOLPO::IRGC 31727-1		BHOJON KOLPO		IRGC 31727		Bangladesh	Bangladesh	SAE	XI-2	22.3436
CX160	IRGC 136066	W 1263					IRMBN	India	India	SAC	XI-2	22.3319
CX269	IRGC 135911	IAC 165					IRMBN	Brazil	Brazil	SAM	GJ-trp	22.3015
IRIS_313-11929	IRGC 127385	GILINGAN MARANGRAS::IRGC 75213-1		GILINGAN MARANGRAS		IRGC 75213		Philippines	Philippines	SER	GJ-trp	22.2195
CX235	IRGC 136013	NSIC RC 9					IRMBN	Philippines	Philippines	SER-IRRI	XI-adm	22.1993
CX142	IRGC 135823	Ai Yeh Lu					IRMBN	China	China	EAS	GJ-adm	22.1554
CX11	NA	Gumei 2	Gu Mei 2		谷梅2号		IRMBN	China	China	EAS	GJ-adm	22.1544
CX290	NA	Duo 57			多57		IRMBN	China	China	EAS	XI-1B	22.1472
IRIS_313-10706	NA	ANAK CHINA::IRGC 14479-1		ANAK CHINA		IRGC 14479		Malaysia	Malaysia	SER	XI-3	22.0886
CX82	IRGC 136073	X 21	X21				IRMBN	Vietnam	Viet Nam	SEA	XI-1B	22.0863
IRIS_313-10726	IRGC 128139	POTO BALA::IRGC 15986-2		POTO BALA		IRGC 15986		Senegal	Senegal	WAF	XI-3	22.0598
IRIS_313-12349	IRGC 127592	MAK KHEUA DENG::IRGC 107709-1		MAK KHEUA DENG		IRGC 107709		Lao People's Democratic Republic	Lao People's Democratic Republic	SEA	GJ-sbtrp	22.0561
IRIS_313-10859	IRGC 127933	ARC 10939::IRGC 21150-2		ARC 10939		IRGC 21150		India	India	SAC	XI-adm	22.0176
IRIS_313-11742	IRGC 127480	KALIBAJARI::IRGC 67718-1		KALIBAJARI		IRGC 67718		India	India	SAC	cA (Aus)	21.9709
IRIS_313-11240	IRGC 128020	CR 157-392-4::IRGC 39247-2		CR157-392-4		IRGC 39247		India	India	SAC	XI-adm	21.9677
IRIS_313-10333	IRGC 125951	B 6136-3-TB-0-1-5::IRGC 117312-1		B 6136-3-TB-0-1-5		IRGC 117312		Indonesia	Indonesia	SER	XI-1B	21.9438
IRIS_313-11338	IRGC 128097	LOBANG (WHITE)::IRGC 44548-2		LOBANG(WHITE)		IRGC 44548		Philippines	Philippines	SER	XI-adm	21.9073
B070	NA	Laoguangtou 83	Lao Guangtou 83		老光头83		MC	China	China	EAS	GJ-adm	21.869
IRIS_313-8173	IRGC 121959	A 201::GERVEX 1638-C1		A 201				United States of America	United States of America	NAM	GJ-trp	21.8532
IRIS_313-8755	IRGC 126120	NORIN 6::IRGC 2633-1		NORIN 6		IRGC 2633		Japan	Japan	EAR	GJ-tmp	21.788
CX149	NA	Karnal Local					IRMBN	India	India	SAC	cB (Bas)	21.7707
IRIS_313-11238	NA	IAC 1132::IRGC 39052-1		IAC1132		IRGC 39052		Brazil	Brazil	SAM	GJ-trp	21.7551
IRIS_313-8454	IRGC 125618	LAI YIP ZIM::IRGC 4955-1		LAI YIP ZIM		IRGC 4955		Taiwan	Taiwan	EAR	XI-1A	21.7231
CX303	IRGC 135976	LX 2007					IRMBN	China	China	EAS	XI-adm	21.6807
CX6	NA	C418					IRMBN	China	China	EAS	admix	21.6494
CX274	IRGC 135919	IR 26					IRMBN	Philippines	Philippines	SER-IRRI	XI-adm	21.645
IRIS_313-10793	IRGC 132257	MELIK::IRGC 18238-2		MELIK		IRGC 18238		Indonesia	Indonesia	SER	GJ-trp	21.627
IRIS_313-11394	IRGC 128057	INDO NO 13030::IRGC 48630-2				IRGC 48630		Indonesia	Indonesia	SER	XI-adm	21.5975
IRIS_313-12000	IRGC 135569	LAANG::IRGC 79258-1		LAANG		IRGC 79258		Cambodia	Cambodia	SEA	XI-3	21.5927
B125	NA	Xiangwanxian 3	Xiang Wan Xian 3		湘晚籼3号		MC	China	China	EAS	XI-adm	21.5335
IRIS_313-7883	IRGC 122052	GANIGI::IRGC 48698-C1		GANIGI		IRGC 48698		Indonesia	Indonesia	SER	GJ-trp	21.525
CX307	NA	HP 121					IRMBN	China	China	EAS	GJ-adm	21.4976
IRIS_313-12355	IRGC 127650	NASAENG::IRGC 107819-1		Nasaeng		IRGC 107819		Lao People's Democratic Republic	Lao People's Democratic Republic	SEA	XI-adm	21.4528
IRIS_313-11027	IRGC 127454	JHONA 101::IRGC 27976-1		JHONA 101		IRGC 27976		Pakistan	Pakistan	SAW	cA (Aus)	21.431
IRIS_313-11416	IRGC 127529	KONAMANI::IRGC 49806-1		KONAMANI		IRGC 49806		India	India	SAC	XI-2	21.4066
CX262	IRGC 135912	IAC 3					IRMBN	China	Brazil	SAM	GJ-trp	21.4014
CX110	IRGC 136062	UP 15	UP15				IRMBN	Japan	Japan	EAR	cB (Bas)	21.3704
B191	IRGC 135818	80 A 60 YR 71009-1-5					MC	Australia_	Australia	OCE	GJ-trp	21.3492
B183	IRGC 136030	Qingnuo Kyohatamochi	Toyohatamochi		清 糯 キョハタモチ		MC	Japan	Japan	EAR	GJ-tmp	21.3045
CX219	IRGC 135888	FL 478					IRMBN	Philippines	Philippines	SER-IRRI	XI-adm	21.2998
B094	NA	Zinuo	Zi Nuo		紫糯		MC	China	China	EAS	XI-1A	21.2864
IRIS_313-11372	IRGC 128173	SUFALDHULA::IRGC 46698-2		SUFALDHULA		IRGC 46698		India	India	SAC	XI-2	21.2843
IRIS_313-8557	IRGC 131956	SERENDAH SUNGAI DUA 25::IRGC 13892-1		SERENDAH SUNGAI DUA 25		IRGC 13892		Malaysia	Malaysia	SER	XI-3	21.2769
IRIS_313-9112	IRGC 125826	LEUANG YAI 344::IRGC 651-1		LEUANG YAI 344		IRGC 651		Thailand	Thailand	SEA	XI-3	21.261
IRIS_313-10687	NA	PADI PULUT::IRGC 13444-1		PADI PULUT		IRGC 13444		Malaysia	Malaysia	SER	XI-3	21.2545
B045	IRGC 135896	Gongchengxiang	Miyagika		宫城香		MC	Japan	Japan	EAR	GJ-tmp	21.2526
IRIS_313-11930	IRGC 127444	ITA 117::IRGC 75235-1		ITA 117		IRGC 75235		Nigeria	Nigeria	WAF	XI-1B	21.2392
IRIS_313-12033	IRGC 127377	GAO JIAO HONG::IRGC 80920-1		GAO JIAO HONG		IRGC 80920		China	China	EAS	XI-1A	21.2252
CX355	IRGC 136085	Yunlu 102	Yun Lu 102		云陆102		IRMBN	China	China	EAS	GJ-trp	21.2235
CX561	NA	177-74					IRMBN		China	EAS	XI-1B	21.2105
IRIS_313-9039	IRGC 121441	MUTTU SAMBA::IRGC 36333-1		MUTTU SAMBA		IRGC 36333		Sri Lanka	Sri Lanka	IOC	XI-2	21.2102
B149	NA	Haoxiang	Hao Xiang		毫香		MC	China	China	EAS	XI-1A	21.2082
IRIS_313-11835	IRGC 128287	E NOI NAH::IRGC 71138-1		E-NOI NAH		IRGC 71138		Thailand	Thailand	SEA	XI-adm	21.1829
IRIS_313-8453	IRGC 126043	ARC 18597::IRGC 43299-1		ARC 18597		IRGC 43299		India	India	SAC	XI-adm	21.1418
CX134	IRGC 135948	IRBB 7					IRMBN	Philippines	Philippines	SER-IRRI	XI-1B	21.1402
IRIS_313-12127	IRGC 127431	INPONG::IRGC 85524-1		INPONG		IRGC 85524		Lao People's Democratic Republic	Lao People's Democratic Republic	SEA	XI-3	21.1317
IRIS_313-9182	IRGC 125803	KHAO MON::IRGC 60764-1		KHAO MON		IRGC 60764		Myanmar	Myanmar	SEA	XI-adm	21.0629
IRIS_313-8595	IRGC 126240	MAKALIOKA STANDARD::IRGC 12768-1		MAKALIOKA STANDARD		IRGC 12768		Madagascar	Madagascar	IOC	XI-2	21.0021
CX383	NA	Hongza	Hong Za		红杂		IRMBN	China	China	EAS	GJ-tmp	20.9933
CX92	IRGC 136063	UPR 191-66					IRMBN	India	India	SAC	XI-1B	20.9574
B016	IRGC 135829	Aomierte 168	Omirt 168		奥米尔特168		MC	Hungary_	Hungary	EUR	GJ-tmp	20.9341
CX276	IRGC 135939	IR 8192-200-3-3-1-1					IRMBN	Philippines	Philippines	SER-IRRI	XI-1B	20.9089
IRIS_313-8923	IRGC 125693	CALIFORNIA BELLE::IRGC 66836-1		CALIFORNIA BELLE		IRGC 66836		United States of America	United States of America	NAM	GJ-trp	20.9005
IRIS_313-11693	IRGC 127278	CHING CH'UNG::IRGC 65002-1		CHING-CH'UNG		IRGC 65002		Taiwan	Taiwan	EAR	XI-adm	20.8962
IRIS_313-11079	IRGC 128132	PHAN PHAE::IRGC 29652-2		Phan phae		IRGC 29652		Lao People's Democratic Republic	Lao People's Democratic Republic	SEA	XI-3	20.8905
IRIS_313-12060	IRGC 128365	LIJIAN 942::IRGC 82399-1		LIJIAN 942		IRGC 82399		China	China	EAS	GJ-adm	20.8697
IRIS_313-12228	IRGC 128474	SOM::IRGC 92221-1		Som		IRGC 92221		Lao People's Democratic Republic	Lao People's Democratic Republic	SEA	GJ-sbtrp	20.8582
B197	NA	Taizhongxianxuan 2	Taichung 2 selection		台中籼选2		MC	China	Taiwan	EAR	XI-1A	20.8508
B061	NA	Guangluai 4	Guang Lu Ai		广陆矮4号		MC	China	China	EAS	XI-1A	20.8354
IRIS_313-8125	IRGC 122203	PLOVDIV 22::GERVEX 1167-C1		PLOVDIV 22				Bulgaria	Bulgaria	EUR	GJ-tmp	20.827
IRIS_313-11547	IRGC 135580	SHWE SABA::IRGC 58206-1		SHWE SABA		IRGC 58206		Myanmar	Myanmar	SEA	XI-adm	20.825
IRIS_313-11882	IRGC 127605	MAN TIAN QING::IRGC 72776-1		MAN TIAN QING		IRGC 72776		China	China	EAS	XI-1A	20.7913
IRIS_313-8151	IRGC 122273	VALTEJO::GERVEX 1355-C1		VALTEJO				Portugal	Portugal	EUR	GJ-tmp	20.7599
CX240	IRGC 135859	Carijo					IRMBN	Brazil	Brazil	SAM	XI-adm	20.7369
CX288	IRGC 135874	D 11					IRMBN	China	India	SAC	XI-adm	20.6764
IRIS_313-11038	IRGC 127924	AI NAN TSAO 39::IRGC 28461-2		AI-NAN-TSAO 39		IRGC 28461		China	China	EAS	XI-1A	20.6612
IRIS_313-10954	IRGC 127700	PADI GRUNDUL 1::IRGC 25493-1		PADI GRUNDUL 1		IRGC 25493		Indonesia	Indonesia	SER	XI-3	20.6229
B046	IRGC 136032	Qiutianxiaoting	Akita Komachi		秋田小町		MC	Japan	Japan	EAR	GJ-tmp	20.6219
IRIS_313-12044	IRGC 135641	SAR SIEM::IRGC 81386-2		SAR SIEM		IRGC 81386		Cambodia	Cambodia	SEA	XI-3	20.6071
CX270	NA	TAICHUNGNATIVE1	TAICHUNG NATIVE 1		台中本地1号		IRMBN	Taiwan	Taiwan	EAR	XI-1A	20.6063
CX227	IRGC 135964	KASALATH	KASALOTH AS 2				IRMBN	Japan	India	SAC	cA (Aus)	20.5966
CX409	NA	BG134	Xa8 (BG134)		Xa8		IRMBN		Philippines	SER-IRRI	XI-1B	20.596
IRIS_313-12121	IRGC 127254	CHA LIENG::IRGC 84920-1		CHA LIENG		IRGC 84920		Lao People's Democratic Republic	Lao People's Democratic Republic	SEA	XI-3	20.5452
CX250	IRGC 135820	829					IRMBN	China	China	EAS	XI-1B	20.488
CX120	IRGC 136057	TKM 6	TKM6				IRMBN	India	India	SAC	XI-adm	20.4777
CX138	NA	Qd_441					IRMBN	China	China	EAS	GJ-adm	20.4415
IRIS_313-10020	IRGC 120968	HODARAWALA::IRGC 67631-1		HODARAWALA		IRGC 67631		Sri Lanka	Sri Lanka	IOC	cA (Aus)	20.4279
IRIS_313-10941	IRGC 127809	SINTHA::IRGC 24687-1		SINTHA		IRGC 24687		Indonesia	Indonesia	SER	XI-adm	20.3718
IRIS_313-8986	IRGC 125637	ARC 10754::IRGC 12603-1		ARC 10754		IRGC 12603		India	India	SAC	XI-adm	20.3681
CX107	IRGC 136060	Tun Sart					IRMBN	Vietnam	Viet Nam	SEA	XI-3	20.3662
IRIS_313-11062	IRGC 127218	BEGUNBICHI 33::IRGC 29260-1		BEGUNBICHI 33		IRGC 29260		Bangladesh	Bangladesh	SAE	cB (Bas)	20.3614
CX158	IRGC 136046	Shwe War Tun					IRMBN	Vietnam	Myanmar	SEA	XI-3	20.3525
IRIS_313-11040	NA	KAVIVARI SAMBA::IRGC 28597-2		KAVIVARI SAMBA		IRGC 28597		India	India	SAC	XI-adm	20.3364
IRIS_313-10657	IRGC 135801	THANGONE::IRGC 11816-3		THANGONE		IRGC 11816		Lao People's Democratic Republic	Lao People's Democratic Republic	SEA	GJ-sbtrp	20.3328
IRIS_313-8586	IRGC 126081	PLI KHAO::IRGC 64596-1		PLI KHAO		IRGC 64596		Thailand	Thailand	SEA	XI-3	20.3299
IRIS_313-10718	IRGC 128073	KARUTHA SEENATI::IRGC 15515-2		KARUTHA SEENATI		IRGC 15515		Sri Lanka	Sri Lanka	IOC	cA (Aus)	20.3297
IRIS_313-10847	IRGC 127972	ARC 6015::IRGC 20314-2		ARC 6015		IRGC 20314		India	India	SAC	XI-adm	20.3221
B011	IRGC 135870	CO 22					MC	India	India	SAC	XI-adm	20.3027
B167	IRGC 136029	Qingjinzaosheng	Jogi Cheongjin		清津早生		MC	North_Korea	Democratic People's Republic of Korea	EAR	GJ-tmp	20.2612
CX162	NA	TN1					IRMBN	Taiwan	Taiwan	EAR	XI-1A	20.2294
IRIS_313-10503	IRGC 127398	HA GOO::IRGC 4577-1		HA-GOO		IRGC 4577		China	China	EAS	XI-1A	20.2178
CX579	NA	C22	C 22				IRMBN		Philippines	SER-IRRI	admix	20.2067
CX285	IRGC 136010	Nonglinnuo	Nonglin Nuo		农林糯		IRMBN	China	China	EAS	GJ-trp	20.1904
CX367	NA	Haogelao	Hao Ge Lao		豪格劳		IRMBN	China	China	EAS	GJ-trp	20.1817
CX182	IRGC 136047	SLG 1	SLG1				IRMBN	Japan	Japan	EAR	XI-adm	20.1534
CX397	NA	Nangeng 46 (Soft Rice)	Nan Geng 46 (Ruan Mi)		南粳46（软米）		IRMBN	China	China	EAS	GJ-tmp	20.1396
IRIS_313-10727	NA	KOUPENEDOU KOUBOURY::IRGC 16011-1		KOUPENEDOU KOUBOURY		IRGC 16011		Senegal	Senegal	WAF	XI-3	20.1374
IRIS_313-11528	IRGC 127917	ZO::IRGC 56914-1		ZO		IRGC 56914		Cote d'Ivoire	Cote d'Ivoire	WAF	XI-3	20.1293
B217	NA	Honggu	Hong Gu		红谷		MC	China	China	EAS	XI-1B	20.1183
IRIS_313-11224	IRGC 128130	PATNAI 31-679::IRGC 38149-2		PATNAI 31-679		IRGC 38149		Bangladesh	Bangladesh	SAE	XI-2	20.1042
IRIS_313-11842	NA	NIAW YUANG KHANUN::IRGC 71362-1		NIAW YUANG KHANUN		IRGC 71362		Thailand	Thailand	SEA	XI-3	20.0684
IRIS_313-11252	NA	ADR 52::IRGC 40638-2		ADR52		IRGC 40638		India	India	SAC	XI-adm	20.0681
IRIS_313-7646	IRGC 124378	BETSILAIZINA::GERVEX 8405-C1		BETSILAIZINA				Madagascar	Madagascar	IOC	admix	20.0483
IRIS_313-10524	IRGC 136182	KHAO BAI SRI::IRGC 6110-2		KHAO BAI SRI		IRGC 6110			Thailand	SEA	XI-3	20.0258
B226	NA	Heimangdao	Hei Mang Dao		黑芒稻		MC	China	China	EAS	GJ-tmp	20.0237
CX305	IRGC 136090	ZH 5	Zheng Dao 5				IRMBN	China	China	EAS	XI-1B	20.0173
IRIS_313-10526	NA	CO 2::IRGC 6186-2		CO 2		IRGC 6186		India	India	SAC	XI-2	20.0165
IRIS_313-10968	IRGC 127428	IH PEN SHIM MING::IRGC 26067-1		IH PEN SHIM MING		IRGC 26067		Brazil	Brazil	SAM	XI-1A	19.9911
CX117	IRGC 135930	IR 65600-27-1-2-2					IRMBN	Philippines	Philippines	SER-IRRI	XI-adm	19.9868
IRIS_313-11460	IRGC 127792	SELHI::IRGC 52760-1		SELHI		IRGC 52760		India	India	SAC	XI-2	19.9681
IRIS_313-8386	IRGC 126173	ARC 10812::IRGC 21074-1		ARC 10812		IRGC 21074		India	India	SAC	XI-adm	19.9514
IRIS_313-10578	IRGC 132028	PARAY QIKUG KABAYUH::IRGC 8059-1		PARAY QIKUG KABAYUH		IRGC 8059		Philippines	Philippines	SER	GJ-trp	19.9472
CX125	NA	CAOZHAO-2	CAO ZHAO 2				IRMBN	China	China	EAS	XI-1B	19.9403
IRIS_313-10301	IRGC 126064	IRGA 959-1-2-2F-4-1-4A-6-CA-6X::IRGC 117006-1		IRGA 959-1-2-2F-4-1-4A-6-CA-6X		IRGC 117006		Brazil	Brazil	SAM	XI-adm	19.928
B254	NA	Jinghu3 B	Jing Hu B		京虎B		MC	China	China	EAS	XI-adm	19.9195
CX4	IRGC 136195	93072					IRMBN	China	China	EAS	XI-adm	19.9167
B066	NA	Guangkexiangnuo	Guang Ke Xiang Nuo		光壳香糯		MC	China	China	EAS	GJ-tmp	19.9129
B229	NA	Menjiading 2	Men Jia Ding 2		闷加丁2		MC	China	China	EAS	XI-adm	19.905
IRIS_313-9379	IRGC 125768	HWANGJO::IRGC 55547-1		HWANGJO		IRGC 55547		Korea, Republic of	Korea, Republic of	EAR	GJ-tmp	19.8913
CX234	IRGC 135928	IR 62266-42-6-2					IRMBN	Philippines	Philippines	SER-IRRI	XI-adm	19.8447
IRIS_313-8681	NA	KOLITONDO::IRGC 66497-1		KOLITONDO		IRGC 66497		Guinea	Guinea	WAF	XI-3	19.8394
CX304	IRGC 135975	Luyin 46	Lu Yin 46		陆引46		IRMBN	China	China	EAS	XI-adm	19.8304
IRIS_313-11484	IRGC 127357	EJALI::IRGC 53500-1		EJALI		IRGC 53500		Bangladesh	Bangladesh	SAE	cA (Aus)	19.8179
CX380	NA	Yandao 9	Yan Dao 9		盐稻9号		IRMBN	China	China	EAS	GJ-tmp	19.8028
CX296	IRGC 135937	IR 74					IRMBN	Philippines	Philippines	SER-IRRI	XI-adm	19.7934
IRIS_313-11262	IRGC 127952	ARC 13888::IRGC 41288-2		ARC 13888 BROWN SPOTS ON STRAW		IRGC 41288		India	India	SAC	XI-adm	19.7914
IRIS_313-12094	IRGC 127496	KASHA::IRGC 83865-1		KASHA		IRGC 83865		Bangladesh	Bangladesh	SAE	cB (Bas)	19.7687
CX328	NA	Baoxuan 21	Bao Xuan 21		包选21号		IRMBN	China	China	EAS	XI-1A	19.7615
CX140	IRGC 136196	Nipponbare					IRMBN	Japan	Japan	EAR	GJ-tmp	19.7594
CX381	IRGC 135821	Adny 11					IRMBN	na	Mali	WAF	XI-1B	19.758
CX121	NA	Guang122	Guang 122				IRMBN	China	China	EAS	XI-1B	19.7404
IRIS_313-9470	IRGC 126310	SAHULO FACHE SOYO::IRGC 66630-1		SAHULO FACHE SOYO		IRGC 66630		Indonesia	Indonesia	SER	GJ-trp	19.729
IRIS_313-10762	IRGC 127207	BANDI::IRGC 17214-1		BANDI		IRGC 17214		Indonesia	Indonesia	SER	XI-3	19.7119
IRIS_313-11945	IRGC 127598	MALIKULI::IRGC 76237-1		MALIKULI		IRGC 76237		Bangladesh	Bangladesh	SAE	XI-2	19.6836
B235	NA	Zhonghua 8	Zhong Hua 8		中花8号		MC	China	China	EAS	GJ-tmp	19.6727
IRIS_313-11522	IRGC 128505	XINTUAN HEI GU::IRGC 56159-1		XINTUAN HEI GU		IRGC 56159		China	China	EAS	GJ-adm	19.6605
IRIS_313-10666	IRGC 127164	ARC 6218::IRGC 12255-1		ARC 6218		IRGC 12255		India	India	SAC	XI-adm	19.6394
CX348	IRGC 136093	Zhonghua 1			中华1号		IRMBN	China	China	EAS	XI-1B	19.6374
IRIS_313-10563	IRGC 128469	SHA TIAO TSAO::IRGC 7339-1		SHA-TIAO-TSAO		IRGC 7339			China	EAS	GJ-tmp	19.6342
IRIS_313-11054	IRGC 127184	AUS 295::IRGC 29083-1		AUS 295		IRGC 29083		Bangladesh	Bangladesh	SAE	cA (Aus)	19.6106
B074	NA	Taishannuo	Tai Shan Nuo		台山糯		MC	China	China	EAS	XI-1A	19.5973
IRIS_313-10602	IRGC 127329	DM 49::IRGC 8775-1		DM49		IRGC 8775		Bangladesh	Bangladesh	SAE	cA (Aus)	19.5935
IRIS_313-8341	IRGC 121599	BAT DO::IRGC 7014-1		BAT DO		IRGC 7014		Viet Nam	Viet Nam	SEA	XI-adm	19.588
CX210	IRGC 136028	Qb_604					IRMBN	China	China	EAS	admix	19.5872
CX427	NA	BG154	Xa2 (BG154)		Xa2		IRMBN		Philippines	SER-IRRI	GJ-tmp	19.5805
B017	IRGC 135822	Aerjituo	Arditsone		阿尔季托		MC	Bulgaria_	Bulgaria	EUR	GJ-tmp	19.5802
CX231	IRGC 135923	IR 52561-UBN-1-1-2					IRMBN	Philippines	Philippines	SER-IRRI	XI-adm	19.5785
IRIS_313-11055	IRGC 127185	AUS 299::IRGC 29087-1		AUS 299		IRGC 29087		Bangladesh	Bangladesh	SAE	cA (Aus)	19.5666
B116	NA	Shufeng 101	Shu Feng 101		蜀丰101		MC	China	China	EAS	XI-adm	19.564
CX286	IRGC 135855	C 349					IRMBN	China	China	EAS	admix	19.5331
IRIS_313-11959	IRGC 135756	KAGIOS PUTI::IRGC 76965-3		KAGIOS PUTI		IRGC 76965		Philippines	Philippines	SER	XI-3	19.5125
CX230	IRGC 135929	IR 64-IL					IRMBN	China	Philippines	SER-IRRI	XI-1B	19.5058
IRIS_313-10682	IRGC 127707	PA KHENG::IRGC 12996-1		PA KHENG		IRGC 12996		Lao People's Democratic Republic	Lao People's Democratic Republic	SEA	XI-3	19.502
CX141	IRGC 136019	Padi Siam Kuning					IRMBN	Malaysia	Indonesia	SER	XI-3	19.4989
IRIS_313-8356	IRGC 126188	BLICCA::IRGC 47151-1		BLICCA		IRGC 47151		Philippines	Philippines	SER	GJ-trp	19.4967
IRIS_313-11043	NA	BENGKA KERSEK::IRGC 28666-1		BENGKA KERSEK		IRGC 28666		Malaysia	Malaysia	SER	XI-3	19.4947
IRIS_313-8010	IRGC 122109	IR 71524-44-1-1::C1		IR 71524-44-1-1				Philippines	Philippines	SER-IRRI	GJ-trp	19.4645
CX411	NA	BG136	Xa11 (BG136)		Xa11		IRMBN		Philippines	SER-IRRI	XI-1B	19.4582
B052	IRGC 135949	J 34					MC	Madagascar_	Madagascar	IOC	XI-2	19.4498
CX356	NA	Yandao 8	Yan Dao 8		盐稻8号		IRMBN	China	China	EAS	GJ-tmp	19.4384
IRIS_313-11035	IRGC 128513	ZIRA SHAHI::IRGC 28327-1		ZIRA SHAHI		IRGC 28327		Pakistan	Pakistan	SAW	admix	19.4373
CX89	IRGC 135977	M 202					IRMBN	United_States	United States of America	NAM	XI-adm	19.425
IRIS_313-11042	NA	VELLAIKOTTAI::IRGC 28618-1		VELLAIKOTTAI		IRGC 28618		India	India	SAC	XI-adm	19.4202
IRIS_313-10894	IRGC 127150	ARC 13204::IRGC 22558-1		ARC 13204		IRGC 22558		India	India	SAC	admix	19.3928
IRIS_313-12040	IRGC 132285	NEANG LAU::IRGC 81328-1		NEANG LAU		IRGC 81328		Cambodia	Cambodia	SEA	XI-3	19.3875
IRIS_313-11129	IRGC 128051	HAORU::IRGC 33090-2		HAORU		IRGC 33090		Myanmar	Myanmar	SEA	XI-adm	19.3654
IRIS_313-11530	IRGC 131993	JAO KHAO::IRGC 57046-1		JAO KHAO		IRGC 57046		Thailand	Thailand	SEA	XI-3	19.3574
CX206	IRGC 135918	IR 2061-522-6-9					IRMBN	Philippines	Philippines	SER-IRRI	XI-1B	19.3344
B010	NA	Malaihong	Merah		马来红		MC	Malaysia	Malaysia	SER	XI-1A	19.2456
IRIS_313-9917	IRGC 125699	CHANDINA::IRGC 36420-1		CHANDINA		IRGC 36420		Sri Lanka	Sri Lanka	IOC	XI-1B	19.2306
IRIS_313-11994	IRGC 131996	KALINDIG::IRGC 78968-1		KALINDIG		IRGC 78968		Philippines	Philippines	SER	GJ-trp	19.1937
IRIS_313-10798	IRGC 135640	NOGO BELE 2::IRGC 18328-2		NOGO-BELE 2		IRGC 18328		Indonesia	Indonesia	SER	GJ-trp	19.1807
B107	NA	Dawannuo	Da Wan Nuo		大弯糯		MC	China	China	EAS	XI-adm	19.1465
IRIS_313-11772	IRGC 128452	ROJON'NY NTAOLO::IRGC 69410-1		ROJON'NY NTAOLO		IRGC 69410		Madagascar	Madagascar	IOC	XI-2	19.1301
CX207	NA	Gaozi	Gao Zi		高紫		IRMBN	China	China	EAS	XI-adm	19.1199
IRIS_313-10664	IRGC 127163	ARC 6052::IRGC 12196-1		ARC 6052		IRGC 12196		India	India	SAC	XI-2	19.0946
CX400	NA	TOG 5674	no_varname IRGC 96790 (TOG 5674)				IRMBN	Africa	Nigeria	WAF	admix	19.0918
CX124	IRGC 135936	IR 71466-75-3-B-1					IRMBN	Philippines	Philippines	SER-IRRI	XI-adm	19.088
IRIS_313-12164	IRGC 127723	PA YANG NOEUGN::IRGC 87778-1		PA YANG NOEUGN		IRGC 87778		Cambodia	Cambodia	SEA	GJ-adm	19.0867
IRIS_313-11461	IRGC 127881	VAIKATHARYAN::IRGC 52805-1		VAIKATHARYAN		IRGC 52805		India	India	SAC	XI-2	19.0785
CX408	NA	BG133	Xa7 (BG133)		Xa7		IRMBN		Philippines	SER-IRRI	XI-1B	19.0764
IRIS_313-11829	IRGC 128396	MUNJI::IRGC 70928-1		MUNJI		IRGC 70928		Pakistan	Pakistan	SAW	GJ-tmp	19.0679
IRIS_313-10825	IRGC 132310	KEMA 5::IRGC 19343-2		KEMA 5		IRGC 19343			Sierra Leone	WAF	XI-adm	19.0313
B247	NA	Jinnante B	Jin Nan Te B		金南特B		MC	China	China	EAS	XI-adm	19.0268
IRIS_313-11706	IRGC 132001	KHAO' NOK 4::IRGC 65932-1		KHAO' NOK-4		IRGC 65932		Thailand	Thailand	SEA	XI-3	19.02
IRIS_313-7933	IRGC 122128	KAKANI 2::IRGC 13373-C1		KAKANI 2		IRGC 13373		Nepal	Nepal	SAC	admix	19.0109
IRIS_313-7909	IRGC 122110	IR 71525-19-1-1::C1		IR 71525-19-1-1				Philippines	Philippines	SER-IRRI	GJ-trp	18.9999
CX419	NA	BG145	Xa5+21 (BG145)		Xa5+21		IRMBN		Philippines	SER-IRRI	XI-1B	18.9618
CX243	IRGC 135922	IR 47686-6-2-1-1					IRMBN	Philippines	Philippines	SER-IRRI	GJ-trp	18.9274
CX79	IRGC 135873	Cs 94					IRMBN	Vietnam	Viet Nam	SEA	XI-1B	18.9185
CX306	IRGC 135987	Mongolia Rice	Menggu Dao		蒙古稻		IRMBN	China	China	EAS	GJ-tmp	18.898
CX226	IRGC 135916	IR 06G113					IRMBN	Philippines	Philippines	SER-IRRI	XI-1B	18.8896
IRIS_313-9384	IRGC 125674	BARIK KUDI::IRGC 52807-1		BARIK KUDI		IRGC 52807		India	India	SAC	XI-2	18.8863
IRIS_313-10748	IRGC 127578	LUA DUC::IRGC 16718-1		LUA DUC		IRGC 16718		Viet Nam	Viet Nam	SEA	XI-adm	18.876
B079	IRGC 135887	Esiniu	E Si Niu		饿死牛		MC	China	China	EAS	XI-1A	18.8734
IRIS_313-11848	IRGC 132037	PULUT BURUNG::IRGC 71655-1		PULUT BURUNG		IRGC 71655		Malaysia	Malaysia	SER	XI-3	18.8632
CX420	NA	BG146	Xa13+21 (BG146)		Xa13+21		IRMBN		Philippines	SER-IRRI	XI-1B	18.8548
IRIS_313-11604	IRGC 127829	SUGARKAND::IRGC 61059-1		SUGARKAND		IRGC 61059		India	India	SAC	cA (Aus)	18.837
CX133	NA	Zhengshan97	Zhen shan 97		珍汕97		IRMBN	China	China	EAS	XI-1A	18.8287
IRIS_313-9966	IRGC 125713	CICA 9::IRGC 53079-1		CICA 9		IRGC 53079		Colombia	Colombia	SAM	XI-1B	18.8284
CX392	IRGC 136043	SARD					IRMBN	na	_no_info	na	XI-adm	18.8277
IRIS_313-11189	IRGC 128424	PAIZ AMBARBU::IRGC 36179-1		PAIZ-AMBARBU		IRGC 36179		Union of Soviet Socialist Republics (Former)	Union of Soviet Socialist Republics (Former)	WAS	admix	18.8205
IRIS_313-11607	IRGC 127411	HOLDIGANTHI::IRGC 61105-1		HOLDIGANTHI		IRGC 61105		India	India	SAC	XI-2	18.8134
IRIS_313-12010	IRGC 127900	YAN ZHAN::IRGC 79740-1		YAN ZHAN		IRGC 79740		China	China	EAS	XI-1A	18.8097
CX85	IRGC 135857	C 71					IRMBN	Vietnam	Viet Nam	SEA	XI-adm	18.7923
B225	NA	Guantuibaihe 1	Guan Tui Bai He 1		贯推白禾1		MC	China	China	EAS	GJ-tmp	18.7919
IRIS_313-11264	IRGC 132241	ARC 13934::IRGC 41325-2		ARC 13934		IRGC 41325		India	India	SAC	XI-adm	18.7661
IRIS_313-7911	IRGC 122111	IR 72967-12-2-3::C1		IR 72967-12-2-3				Philippines	Philippines	SER-IRRI	XI-1B	18.7656
CX352	IRGC 135839	BD 007					IRMBN	China	China	EAS	GJ-trp	18.7603
CX349	IRGC 135965	KCD 1					IRMBN	na	_no_info	na	XI-adm	18.7473
IRIS_313-10189	IRGC 125723	DA NUO (ZHAN)::IRGC 72025-1		DA NUO(ZHAN)		IRGC 72025		China	China	EAS	XI-1A	18.7349
IRIS_313-11351	IRGC 127986	BANCHI::IRGC 45055-2		BANCHI		IRGC 45055		India	India	SAC	XI-2	18.7316
CX403	NA	IR 64 A					IRMBN	Philippines	Philippines	SER-IRRI	XI-1B	18.7311
CX48	NA	PT 60					IRMBN	China	China	EAS	XI-adm	18.7199
CX103	IRGC 136036	Rubio					IRMBN	Peru	Peru	SAM	admix	18.7174
CX118	NA	Yetuozai	Ye Tuo Zai		爷驼崽		IRMBN	China	China	EAS	XI-adm	18.714
CX291	IRGC 135875	D 15					IRMBN	China	China	EAS	XI-adm	18.7097
CX361	NA	G341					IRMBN	na	_no_info	na	XI-1B	18.7008
IRIS_313-10397	IRGC 120991	IRGA 318-11-6-9-2B::IRGC 117339-1		IRGA 318-11-6-9-2B		IRGC 117339		Colombia	Colombia	SAM	XI-1B	18.7007
IRIS_313-8436	IRGC 126307	PIKTO MAMAS::IRGC 18487-1		PIKTO MAMAS		IRGC 18487		Indonesia	Indonesia	SER	GJ-trp	18.6883
CX414	NA	BG139	Xa21 (BG139)		Xa21		IRMBN		Philippines	SER-IRRI	XI-1B	18.6782
IRIS_313-11877	IRGC 127125	AN NAN ZAO::IRGC 72576-1		AN NAN ZAO		IRGC 72576		China	China	EAS	XI-1A	18.6751
IRIS_313-12052	IRGC 127109	ADUKKAN::IRGC 81783-1		ADUKKAN		IRGC 81783		India	India	SAC	XI-adm	18.6718
CX72	IRGC 135838	Basmati 385					IRMBN	Pakistan	Pakistan	SAW	cB (Bas)	18.6353
IRIS_313-10352	IRGC 120922	CT 9737-6-1-1-2-2P-M::IRGC 117330-1		CT 9737-6-1-1-2-2P-M		IRGC 117330		Colombia	Colombia	SAM	XI-adm	18.6282
IRIS_313-11615	IRGC 132408	MANARE (PHOM)::IRGC 61437-1		MANARE(PHOM)		IRGC 61437		Guinea	Guinea	WAF	XI-3	18.6251
IRIS_313-12118	IRGC 127691	OVIBENAMPOTAKA + OVIBE + MAKALIOKA::IRGC 84756-1		OVIBENAMPOTAKA + OVIBE + MAKALIOKA		IRGC 84756		Madagascar	Madagascar	IOC	XI-2	18.6225
IRIS_313-12061	IRGC 128509	YUNLEN 13::IRGC 82402-1		YUNLEN 13		IRGC 82402		China	China	EAS	GJ-tmp	18.6099
IRIS_313-8172	IRGC 122048	FIDJI::GERVEX 1636-C1		FIDJI				Philippines	Philippines	SER	admix	18.6049
B036	IRGC 135955	Jijucas Claro					MC	Brazil	Brazil	SAM	GJ-adm	18.5971
IRIS_313-9198	NA	KHAO PONG AEV::IRGC 29820-1		Khao pong aev		IRGC 29820		Lao People's Democratic Republic	Lao People's Democratic Republic	SEA	XI-3	18.5936
B123	NA	Zaoshuxiangheimi	Zaoshu Xiang Hei Mi		早熟香黑米		MC	China	China	EAS	XI-adm	18.5672
B095	NA	Mowangguneiza	Mowang Gunei Za		魔王谷内杂		MC	China	China	EAS	XI-adm	18.567
IRIS_313-11489	IRGC 127482	KALU T 139::IRGC 53670-1		KALU T 139		IRGC 53670		India	India	SAC	cA (Aus)	18.5394
CX362	NA	YZX1					IRMBN	na	_no_info	na	XI-1B	18.5373
CX313	NA	R106					IRMBN	China	China	EAS	XI-adm	18.5278
B236	IRGC 135957	Jindao 1	Jin Dao 1		晋稻1号		MC	China	China	EAS	GJ-tmp	18.5257
IRIS_313-10813	NA	SIAM BARABAI::IRGC 18800-2		SIAM BARABAI		IRGC 18800		Indonesia	Indonesia	SER	XI-3	18.5215
CX410	NA	BG135	Xa10 (BG135)		Xa10		IRMBN		Philippines	SER-IRRI	XI-1B	18.5094
B113	NA	Chenwan 3	Chen Wan 3		郴晚3号		MC	China	China	EAS	XI-adm	18.5004
CX116	IRGC 136070	Wudadaozhong	Daseos ssal		五大稻种		IRMBN	North_Korea	Democratic People's Republic of Korea	EAR	GJ-tmp	18.4873
IRIS_313-10134	IRGC 125871	PIN GAEW 56::IRGC 7887-1		PIN GAEW 56		IRGC 7887		Thailand	Thailand	SEA	XI-3	18.4838
IRIS_313-8119	IRGC 122126	JUBILIENI::GERVEX 992-C1		JUBILIENI				Bulgaria	Bulgaria	EUR	GJ-tmp	18.4729
CX114	NA	Guang Lu Ai 4	Guang Lu Ai		广陆矮4号		IRMBN	China	China	EAS	XI-1A	18.4653
B176	IRGC 135850	BRC 25-146-2-1					MC	Bangladesh_	Bangladesh	SAE	XI-adm	18.4566
IRIS_313-10026	IRGC 125804	KITRANA 1007::IRGC 68517-1		KITRANA 1007		IRGC 68517		Madagascar	Madagascar	IOC	XI-2	18.434
B006	IRGC 136078	Yikong	I Khong		伊空		MC	Vietnam	Viet Nam	SEA	XI-adm	18.4295
IRIS_313-10541	IRGC 131990	IACA ESCURO::IRGC 6636-1		IACA ESCURO		IRGC 6636		Guinea-Bissau	Guinea-Bissau	WAF	GJ-trp	18.4174
IRIS_313-9116	IRGC 126138	LEUANG YAI 2 B 72::IRGC 882-1		LEUANG YAI 2 B 72		IRGC 882		Thailand	Thailand	SEA	XI-3	18.3894
IRIS_313-12024	IRGC 127866	TOS 9795::IRGC 80142-1				IRGC 80142			Sierra Leone	WAF	XI-1B	18.3819
IRIS_313-11467	IRGC 128372	MACAPAGAL::IRGC 52927-1		MACAPAGAL		IRGC 52927		Philippines	Philippines	SER	XI-3	18.3771
IRIS_313-8768	IRGC 127060	MOROFIN::IRGC 56698-1		MOROFIN		IRGC 56698		Cote d'Ivoire	Cote d'Ivoire	WAF	GJ-trp	18.3683
B076	NA	Minbeiwanxian	Min Bei Wan Xian		闽北晚籼		MC	China	China	EAS	XI-adm	18.3553
IRIS_313-10564	IRGC 128209	250 KUNGANI 1::IRGC 7370-1		250 KUNGANI 1		IRGC 7370		Japan	Japan	EAR	GJ-tmp	18.3477
IRIS_313-10778	NA	KENTJANA MAHANG::IRGC 17818-1		KENTJANA MAHANG		IRGC 17818		Indonesia	Indonesia	SER	XI-3	18.3451
IRIS_313-11867	IRGC 127503	KE SHU BAI::IRGC 72183-1		KE SHU BAI		IRGC 72183		China	China	EAS	XI-1A	18.3299
B100	NA	Hongkezhenuo	Hong Ke Zhe Nuo		红壳折糯		MC	China	China	EAS	GJ-tmp	18.3217
IRIS_313-11953	IRGC 127783	SAN BAO GU::IRGC 76732-1		SAN BAO GU		IRGC 76732		China	China	EAS	XI-1A	18.3101
IRIS_313-9701	IRGC 125911	TAICHUNG 65::IRGC 79-1		TAICHUNG 65		IRGC 79		Taiwan	Taiwan	EAR	GJ-tmp	18.3062
IRIS_313-7638	IRGC 121963	ANGIFOTSY 685::GERVEX 4717-C1		ANGIFOTSY 685				Madagascar	Madagascar	IOC	XI-adm	18.295
CX275	NA	IR 34					IRMBN	Philippines	Philippines	SER-IRRI	XI-adm	18.2711
IRIS_313-8323	NA	REXARK ROGUE::IRGC 1972-1		REXARK ROGUE		IRGC 1972		United States of America	United States of America	NAM	GJ-trp	18.2703
IRIS_313-8568	IRGC 125619	LARHA MUGAD::IRGC 52339-1		LARHA MUGAD		IRGC 52339		India	India	SAC	XI-2	18.249
B027	IRGC 135858	C 894-21					MC	Philippines	Philippines	SER-IRRI	XI-3	18.1982
IRIS_313-8940	IRGC 125744	FU ZAO XIAN::IRGC 63619-1		FU ZAO XIAN		IRGC 63619		China	China	EAS	XI-1A	18.1967
IRIS_313-11999	IRGC 132281	KAUN TREI::IRGC 79194-1		KAUN TREI		IRGC 79194		Cambodia	Cambodia	SEA	XI-3	18.1867
B005	IRGC 136067	Wanshi	Banjitsu		晚实		MC	Japan	Japan	EAR	GJ-tmp	18.1841
B034	IRGC 135825	Albania Rice			阿尔巴尼亚种		MC	Albania_	Albania	EUR	GJ-tmp	18.1818
CX534	IRGC 136059	Tongnian 1			通粘1号		IRMBN	China	China	EAS	GJ-tmp	18.179
IRIS_313-11302	IRGC 127154	ARC 14899::IRGC 43016-1		ARC 14899		IRGC 43016		India	India	SAC	XI-adm	18.1382
IRIS_313-9121	IRGC 125802	KHAO LEUANG RAI::IRGC 48168-1		KHAO LEUANG RAI		IRGC 48168		Thailand	Thailand	SEA	XI-2	18.1366
CX80	IRGC 136014	OM 1706					IRMBN	Vietnam	Viet Nam	SEA	XI-1B	18.1304
B139	NA	IR 661-1					MC	China	Philippines	SER-IRRI	XI-adm	18.119
IRIS_313-8659	NA	YA THAY SAN::IRGC 58245-1		YA THAY SAN		IRGC 58245		Myanmar	Myanmar	SEA	XI-adm	18.1182
CX315	IRGC 136097	Zidao	Bolasaeg ssal		紫稻		IRMBN	North_Korea	Democratic People's Republic of Korea	EAR	GJ-tmp	18.1003
IRIS_313-11624	IRGC 127122	ANADI WHITE::IRGC 61897-1		ANADI WHITE		IRGC 61897		Nepal	Nepal	SAC	XI-1A	18.0983
IRIS_313-8168	IRGC 121968	ARLESIENNE::GERVEX 1530-C1		ARLESIENNE				France	France	EUR	GJ-adm	18.074
B164	NA	Qingke	Qing Ke		清可		MC	China	China	EAS	cA (Aus)	18.0723
IRIS_313-7725	IRGC 124407	MADINIKA 1329::GERVEX 8366-C1		MADINIKA 1329				Madagascar	Madagascar	IOC	XI-2	18.0592
IRIS_313-11285	NA	ARC 18064::IRGC 42237-1		ARC 18064		IRGC 42237		India	India	SAC	XI-2	18.0586
CX281	IRGC 135934	IR 68897 B					IRMBN	Philippines	Philippines	SER-IRRI	XI-1B	18.0513
IRIS_313-10458	IRGC 127695	P 168::IRGC 1354-1		P168		IRGC 1354		China	China	EAS	XI-1A	18.0487
IRIS_313-8935	IRGC 127034	ARC 18061::IRGC 47650-1		ARC 18061		IRGC 47650		India	India	SAC	XI-adm	18.0288
CX238	IRGC 135854	BW 311-9					IRMBN	Philippines	Sri Lanka	IOC	XI-1B	18.0026
IRIS_313-11275	IRGC 127156	ARC 14975::IRGC 41848-1		ARC 14975		IRGC 41848		India	India	SAC	XI-adm	17.9886
CX314	IRGC 135813	117					IRMBN	China	China	EAS	XI-1B	17.9812
IRIS_313-9922	IRGC 125778	IRI 339::IRGC 46956-1		IRI 339		IRGC 46956		Korea, Republic of	Korea, Republic of	EAR	XI-1B	17.9469
CX233	IRGC 135926	IR 58821-23-1-3-1					IRMBN	Philippines	Philippines	SER-IRRI	XI-adm	17.944
CX350	NA	Wuyugeng 20	Wu Yu Geng 20		武育粳20号		IRMBN	China	China	EAS	GJ-tmp	17.9258
IRIS_313-12048	IRGC 127564	LIMA::IRGC 81487-1		LIMA		IRGC 81487		Indonesia	Indonesia	SER	XI-3	17.9136
IRIS_313-12334	IRGC 127334	DO KHAW::IRGC 106977-1		Do khaw		IRGC 106977		Lao People's Democratic Republic	Lao People's Democratic Republic	SEA	XI-3	17.8964
IRIS_313-12183	IRGC 127796	SETYA::IRGC 88654-1		SETYA		IRGC 88654		Nepal	Nepal	SAC	cA (Aus)	17.8954
CX366	NA	Ganwanxian 37 (926)	Gan Wan Xian 37 (926)		赣 晚 籼 37 号（926）		IRMBN	China	China	EAS	XI-adm	17.8823
IRIS_313-12129	IRGC 128391	MON LAI::IRGC 85857-1		Mon Lai		IRGC 85857		Lao People's Democratic Republic	Lao People's Democratic Republic	SEA	GJ-sbtrp	17.828
IRIS_313-11939	IRGC 127484	KAMPTI::IRGC 75626-1		KAMPTI		IRGC 75626		Burkina Faso	Burkina Faso	WAF	XI-3	17.8174
CX385	IRGC 136011	NPT-100					IRMBN	China	China	EAS	XI-1B	17.8077
IRIS_313-10927	IRGC 127828	SUGA PANKHA::IRGC 24054-1		SUGA PANKHA		IRGC 24054		Nepal	Nepal	SAC	cA (Aus)	17.7995
IRIS_313-8803	IRGC 126283	TEXAS PATNA::IRGC 1797-1		TEXAS PATNA		IRGC 1797		United States of America	United States of America	NAM	GJ-trp	17.798
IRIS_313-10824	IRGC 128053	HOING CANTEL::IRGC 19282-2		HOING CANTEL		IRGC 19282		Indonesia	Indonesia	SER	XI-3	17.7977
CX251	NA	Xudao 4	Xu Dao 4		徐稻4号		IRMBN	China	China	EAS	GJ-tmp	17.7887
B003	IRGC 136088	Zaoshengbai	Zaoshengbai Hao		早生白		MC	China	China	EAS	GJ-adm	17.7708
B258	NA	Xingguo			兴国		MC	China	China	EAS	GJ-tmp	17.7639
IRIS_313-8751	IRGC 126209	HNANWA::IRGC 33118-1		HNANWA		IRGC 33118		Myanmar	Myanmar	SEA	XI-3	17.76
CX165	IRGC 136071	Wuyugeng 3	Wu Yu Geng 3		武育粳3号		IRMBN	China	China	EAS	GJ-tmp	17.7545
IRIS_313-7719	IRGC 122140	KOGONI 91-1::C1		KOGONI 91-1				Mali	Mali	WAF	XI-adm	17.7335
CX342	IRGC 136068	Wanxian 763	Wan Xian 763		皖籼763		IRMBN	China	China	EAS	XI-adm	17.7311
IRIS_313-12268	IRGC 127616	MAYATAUNG::IRGC 95957-1		MAYATAUNG		IRGC 95957		Myanmar	Myanmar	SEA	XI-adm	17.731
B091	NA	Xiaohonggu	Xiao Hong Gu		小红谷		MC	China	China	EAS	XI-adm	17.7056
IRIS_313-10628	IRGC 132361	O. SATIVA::IRGC 10164-2				IRGC 10164		India	India	SAC	XI-2	17.6973
IRIS_313-10392	IRGC 127075	IR 77390-1-6-4-19-1-B::IRGC 117303-1		IR 77390-1-6-4-19-1-B		IRGC 117303		Philippines	Philippines	SER-IRRI	XI-1B	17.6807
IRIS_313-8967	IRGC 125645	ARC 12576::IRGC 22163-1		ARC 12576		IRGC 22163		India	India	SAC	XI-adm	17.6464
IRIS_313-11483	IRGC 128244	BOTESHSHORE::IRGC 53484-1		BOTESHSHORE		IRGC 53484		Bangladesh	Bangladesh	SAE	cA (Aus)	17.6424
IRIS_313-9156	IRGC 126200	DHOLA AMAN (LOWLAND AMAN)::IRGC 8341-1		DHOLA AMAN(LOWLAND AMAN)		IRGC 8341		Bangladesh	Bangladesh	SAE	XI-2	17.6402
CX151	IRGC 135833	AZUCENA					IRMBN	Philippines	Philippines	SER-IRRI	GJ-trp	17.6377
IRIS_313-10544	IRGC 127340	DONGREM::IRGC 6688-1		DONGREM		IRGC 6688		India	India	SAC	XI-2	17.6335
CX358	IRGC 136024	PSBRC 82	PSBRC82				IRMBN	Philippines	Philippines	SER-IRRI	XI-1B	17.6153
IRIS_313-10840	IRGC 128507	YE ZO::IRGC 19888-1		YE ZO		IRGC 19888		Korea, Republic of	Korea, Republic of	EAR	GJ-tmp	17.6092
CX157	IRGC 136025	PTB 33	PTB33				IRMBN	India	India	SAC	XI-adm	17.6089
IRIS_313-11647	IRGC 127666	NCS 809 A::IRGC 62502-1		NCS809 A		IRGC 62502		India	India	SAC	XI-2	17.5798
CX90	IRGC 135863	Chhomromg					IRMBN	Nepal	Nepal	SAC	XI-1B	17.5709
CX347	IRGC 136039	SAGC-7					IRMBN	China	China	EAS	XI-adm	17.5411
IRIS_313-11555	IRGC 135578	PA WOON::IRGC 58656-1		PA WOON		IRGC 58656		Sierra Leone	Sierra Leone	WAF	XI-adm	17.5399
IRIS_313-7994	IRGC 122277	VARY MADINIKA 3566::GERVEX 8448-C1		VARY MADINIKA 3566				Madagascar	Madagascar	IOC	GJ-trp	17.5247
IRIS_313-10542	IRGC 127992	BELLO::IRGC 6658-2		BELLO		IRGC 6658		India	India	SAC	XI-2	17.5189
IRIS_313-10652	IRGC 127268	CHAO PEUAK DENG::IRGC 11602-1		Chao peuak deng		IRGC 11602		Lao People's Democratic Republic	Lao People's Democratic Republic	SEA	XI-3	17.5186
B218	NA	Wuzidui	Wuzi Dui		五子堆		MC	China	China	EAS	GJ-tmp	17.5137
IRIS_313-10440	IRGC 127642	NAGKAYAT::IRGC 584-1		NAGKAYAT		IRGC 584		Philippines	Philippines	SER	GJ-tmp	17.5073
CX354	IRGC 135861	CAU 2					IRMBN	China	Viet Nam	SEA	GJ-adm	17.4846
IRIS_313-10994	IRGC 135783	PANGETAN::IRGC 26942-3		PANGETAN		IRGC 26942		Philippines	Philippines	SER	GJ-trp	17.4775
IRIS_313-12054	IRGC 128312	HUA 24::IRGC 82127-1		HUA 24		IRGC 82127		China	China	EAS	GJ-tmp	17.4684
IRIS_313-11622	IRGC 127467	JUAN YE LAI::IRGC 61825-1		JUAN YE LAI		IRGC 61825		China	China	EAS	XI-1A	17.4536
B241	NA	Lamujia	La Mu Jia		拉木加		MC	China	China	EAS	GJ-sbtrp	17.4528
B033	IRGC 135853	BW 293-2	BW293-2				MC	Sri_lanka	Sri Lanka	IOC	XI-1B	17.4523
CX319	NA	Mengguandamagu	Meng Guan Damagu		孟关大麻谷		IRMBN	China	China	EAS	XI-adm	17.4388
CX282	NA	Lijiangxintuanheigu	Lijiangxin Tuan Hei Gu		丽江新团黑谷		IRMBN	China	China	EAS	GJ-adm	17.4283
IRIS_313-10109	IRGC 125735	EX EBOKOZURU::IRGC 79912-1		EX EBOKOZURU		IRGC 79912		Nigeria	Nigeria	WAF	XI-3	17.4257
CX205	IRGC 135935	IR 69428-6-1-1-3-3					IRMBN	Philippines	Philippines	SER-IRRI	GJ-adm	17.4204
B143	NA	76--1	76-1				MC	China	China	EAS	GJ-tmp	17.4163
CX395	IRGC 136082	YSBR 1					IRMBN	China	China	EAS	admix	17.4018
B089	NA	Qitoubaigu3	Qi Tou Baigu 3		齐头白谷		MC	China	China	EAS	XI-adm	17.3906
IRIS_313-11626	IRGC 127395	GUDURA::IRGC 61955-1		GUDURA		IRGC 61955		Nepal	Nepal	SAC	cB (Bas)	17.3854
B129	NA	Hongainuo	Hong Ai Nuo		红矮糯		MC	China	China	EAS	XI-adm	17.3824
IRIS_313-11024	IRGC 127217	BEGMI 135::IRGC 27845-1		BEGMI 135		IRGC 27845		Pakistan	Pakistan	SAW	cA (Aus)	17.3544
IRIS_313-11301	IRGC 127963	ARC 14868::IRGC 43009-2		ARC 14868		IRGC 43009		India	India	SAC	XI-2	17.3504
IRIS_313-11920	IRGC 127386	GI TAH::IRGC 74883-1		GI TAH		IRGC 74883		Thailand	Thailand	SEA	XI-adm	17.3495
IRIS_313-11435	IRGC 128392	MONMINEUPLEU::IRGC 50873-1		MONMINEUPLEU		IRGC 50873		Cote d'Ivoire	Cote d'Ivoire	WAF	GJ-trp	17.342
IRIS_313-9427	IRGC 125654	ARC 18092::IRGC 42256-1		ARC 18092		IRGC 42256		India	India	SAC	XI-adm	17.3253
IRIS_313-10237	NA	PSBRC 86::IRGC 99716-1		PSBRC86		IRGC 99716		Philippines	Philippines	SER-IRRI	XI-1B	17.3106
B243	IRGC 135910	Huhui 91269	Xianghui 91269		湘恢91269		MC	China	China	EAS	cA (Aus)	17.2957
IRIS_313-9937	IRGC 125888	ROCCA::IRGC 50351-1		ROCCA		IRGC 50351		Italy	Italy	EUR	GJ-tmp	17.2946
B230	NA	Banjiemang2	Ban Jie Mang 2		半节芒		MC	China	China	EAS	GJ-adm	17.2797
IRIS_313-11666	IRGC 127573	LONG GE 33::IRGC 63705-1		LONG GE 33		IRGC 63705		China	China	EAS	XI-adm	17.2565
IRIS_313-11280	IRGC 135735	ARC 15486::IRGC 42055-3		ARC 15486		IRGC 42055		India	India	SAC	XI-adm	17.2559
IRIS_313-11955	IRGC 127901	YE DA GU::IRGC 76834-1		YE DA GU		IRGC 76834		China	China	EAS	XI-1A	17.251
CX84	IRGC 136075	X 23	X23				IRMBN	Vietnam	Viet Nam	SEA	XI-adm	17.2406
IRIS_313-9570	IRGC 125859	NX 3533::IRGC 63796-1		NX 3533		IRGC 63796		China	China	EAS	XI-adm	17.2301
IRIS_313-11978	IRGC 127440	IR 5657-33-2::IRGC 77992-1		IR 5657-33-2		IRGC 77992		Philippines	Philippines	SER-IRRI	XI-1B	17.2272
IRIS_313-10617	IRGC 131998	KARA SHALI::IRGC 9293-1		KARA SHALI		IRGC 9293			Uzbekistan	WAS	GJ-tmp	17.2093
IRIS_313-10923	IRGC 128256	CHABLI CHABOL GLANG::IRGC 23706-1		CHABLI CHABOL GLANG		IRGC 23706		Thailand	Thailand	SEA	GJ-sbtrp	17.207
IRIS_313-11063	IRGC 135741	BORO 70-2::IRGC 29283-3		BORO 70-2		IRGC 29283		Bangladesh	Bangladesh	SAE	cA (Aus)	17.1729
IRIS_313-11546	IRGC 127672	NGA CHAN HMWE::IRGC 58146-1		NGA CHAN HMWE		IRGC 58146		Myanmar	Myanmar	SEA	XI-adm	17.1661
IRIS_313-10999	IRGC 127550	LANDEO::IRGC 27164-1		LANDEO		IRGC 27164		Indonesia	Indonesia	SER	GJ-trp	17.154
IRIS_313-12135	IRGC 127726	PERUBAK LUEY::IRGC 86436-1		PERUBAK LUEY		IRGC 86436		Malaysia	Malaysia	SER	XI-1B	17.1361
B009	IRGC 136065	Vietnam Zaodao	Lua Som		越南早稻		MC	Vietnam	Viet Nam	SEA	XI-1A	17.1354
CX284	NA	Han 502			旱502		IRMBN	China	China	EAS	GJ-adm	17.1266
CX318	NA	Heiheaihui	Heihe Aihui		黑河瑷珲		IRMBN	China	China	EAS	XI-adm	17.1138
IRIS_313-11979	IRGC 127435	IR 19661-364-1-2-3::IRGC 78061-1		IR 19661-364-1-2-3		IRGC 78061		Philippines	Philippines	SER-IRRI	XI-1B	17.1084
IRIS_313-9790	IRGC 125781	JAPONES BALILLA::IRGC 5785-1		JAPONES BALILLA		IRGC 5785		Uruguay	Uruguay	SAM	GJ-tmp	17.1044
IRIS_313-12041	IRGC 132413	NOU::IRGC 81352-1		NOU		IRGC 81352		Cambodia	Cambodia	SEA	XI-3	17.1014
CX104	IRGC 136037	Sadri rice 1					IRMBN	Iran	Iran	WAS	cB (Bas)	17.0938
IRIS_313-8530	IRGC 126199	DHANE BURWA::IRGC 10105-1		DHANE BURWA		IRGC 10105		India	India	SAC	XI-2	17.0938
IRIS_313-7689	IRGC 122092	IR 2307-247-2-2-3::IRGC 77982-C1		IR 2307-247-2-2-3		IRGC 77982		Philippines	Philippines	SER-IRRI	XI-1B	17.0888
IRIS_313-10942	IRGC 127987	BANDANG BUNGKUAKLAN::IRGC 24697-2		BANDANG BUNGKUAKLAN		IRGC 24697		Indonesia	Indonesia	SER	XI-3	17.0786
IRIS_313-10960	IRGC 132042	SUNGKAI::IRGC 25812-1		SUNGKAI		IRGC 25812		Indonesia	Indonesia	SER	GJ-trp	17.0685
IRIS_313-11832	IRGC 131964	AE WAWNG POO DOO::IRGC 71007-1		AE WAWNG POO DOO		IRGC 71007		Thailand	Thailand	SEA	GJ-sbtrp	17.0646
CX423	NA	BG149	Xa4+13+21 (BG149)		Xa4+13+21		IRMBN		Philippines	SER-IRRI	XI-1B	17.0508
B059	NA	Nanjing 11			南京11号		MC	China	China	EAS	XI-1A	17.0335
IRIS_313-12281	IRGC 128457	SALAZANA::IRGC 97219-1		SALAZANA		IRGC 97219		Madagascar	Madagascar	IOC	GJ-trp	17.0036
IRIS_313-12323	IRGC 135563	BAN KEO::IRGC 99953-1		BAN KEO		IRGC 99953		Lao People's Democratic Republic	Lao People's Democratic Republic	SEA	GJ-sbtrp	17.0027
IRIS_313-11792	IRGC 128498	VONBOANGY::IRGC 69947-1		VONBOANGY		IRGC 69947		Madagascar	Madagascar	IOC	GJ-trp	17.0023
IRIS_313-11833	IRGC 132276	BOO MAE::IRGC 71058-1		BOO MAE		IRGC 71058		Thailand	Thailand	SEA	XI-3	16.9987
IRIS_313-11016	IRGC 128328	KACHILON::IRGC 27555-1		KACHILON		IRGC 27555		Bangladesh	Bangladesh	SAE	cA (Aus)	16.9963
IRIS_313-10787	NA	KWATIK PUTIH::IRGC 18053-1		KWATIK PUTIH		IRGC 18053		Indonesia	Indonesia	SER	XI-3	16.9955
IRIS_313-11303	IRGC 128228	ARC 15097::IRGC 43053-1		ARC 15097		IRGC 43053		India	India	SAC	XI-adm	16.9932
IRIS_313-11935	IRGC 132006	KONG KHSACH BANG KATT::IRGC 75350-1		KONG KHSACH BANG KATT		IRGC 75350		Cambodia	Cambodia	SEA	XI-3	16.9771
IRIS_313-10570	IRGC 128263	CHUSEI HONEN::IRGC 7777-1		CHUSEI HONEN		IRGC 7777		Japan	Japan	EAR	GJ-tmp	16.9703
CX416	NA	BG142	Xa4+13 (BG142)		Xa4+13		IRMBN		Philippines	SER-IRRI	XI-1B	16.952
IRIS_313-11902	IRGC 127251	CEMPO TURI::IRGC 73667-1		CEMPO TURI		IRGC 73667		Indonesia	Indonesia	SER	XI-3	16.9408
IRIS_313-10938	NA	SIGUPAI::IRGC 24642-2		SIGUPAI		IRGC 24642		Indonesia	Indonesia	SER	XI-3	16.9388
IRIS_313-8127	IRGC 122207	POLIZESTI 28::GERVEX 1170-C1		POLIZESTI 28				Bulgaria	Bulgaria	EUR	GJ-tmp	16.9198
IRIS_313-7876	NA	DINORADO::IRTP 12568-C1		DINORADO				Philippines	Philippines	SER	GJ-trp	16.917
B096	NA	Jinzhinuo4	Jinzhi Nuo 4		金枝糯		MC	China	China	EAS	XI-adm	16.8932
B090	NA	Zimi	Zi Mi		紫米		MC	China	China	EAS	XI-adm	16.8912
IRIS_313-12108	NA	PARAI JALEY MASIK::IRGC 84215-1		PARAI JALEY MASIK		IRGC 84215		Malaysia	Malaysia	SER	GJ-trp	16.8884
IRIS_313-11228	IRGC 128155	SADAJIRA 19-339::IRGC 38361-2		SADAJIRA 19-339		IRGC 38361		Bangladesh	Bangladesh	SAE	XI-2	16.8724
B023	IRGC 135891	Gaoliqiu	Ga-eul Hangug		高丽秋		MC	North_Korea	Democratic People's Republic of Korea	EAR	GJ-tmp	16.8654
IRIS_313-12300	IRGC 127673	NGAM KON DAM::IRGC 98486-1		NGAM KON DAM		IRGC 98486		Lao People's Democratic Republic	Lao People's Democratic Republic	SEA	XI-adm	16.8643
CX391	IRGC 136079	YJ 30					IRMBN	China	China	EAS	GJ-tmp	16.844
B092	NA	Gongju 73	Gong Ju 73		公居73		MC	China	China	EAS	XI-1A	16.8115
B111	NA	Zimangfeie	Zi Mang Fei E		紫芒飞蛾		MC	China	China	EAS	GJ-tmp	16.8101
IRIS_313-7924	IRGC 122120	IRAT 335::C1		IRAT 335				Bolivia	Bolivia	SAM	GJ-trp	16.8087
IRIS_313-10744	IRGC 127811	SIPON::IRGC 16570-1		SIPON		IRGC 16570		Indonesia	Indonesia	SER	GJ-trp	16.7955
B158	NA	Taizhong 65/taizhongHR539	Taichung 65 / Taichung HR539		台中65号/台中HR539		MC	China	Taiwan	EAR	admix	16.7952
IRIS_313-10834	IRGC 128314	IARI 11387::IRGC 19573-1		IARI 11387		IRGC 19573		India	India	SAC	GJ-sbtrp	16.7671
IRIS_313-10697	NA	SIAM ER 16::IRGC 13910-2		SIAM ER 16		IRGC 13910		Malaysia	Malaysia	SER	XI-3	16.7509
B163	NA	Liushizao	Liushi Zao		六十早		MC	China	China	EAS	XI-1A	16.7335
IRIS_313-11274	IRGC 127155	ARC 14901::IRGC 41811-1		ARC 14901		IRGC 41811		India	India	SAC	cA (Aus)	16.7333
B007	IRGC 136055	Tianhandao	Lua Vung Cao		田旱稻		MC	Vietnam	Viet Nam	SEA	XI-adm	16.7215
IRIS_313-10944	IRGC 132269	SIPULUT SUBANG::IRGC 24824-2		SIPULUT SUBANG		IRGC 24824		Indonesia	Indonesia	SER	XI-3	16.7149
IRIS_313-7722	IRGC 127001	LATSIBOZAKA 112-1::GERVEX 8233-C1		LATSIBOZAKA 112-1				Madagascar	Madagascar	IOC	admix	16.7066
IRIS_313-12146	IRGC 127121	AM BEUS::IRGC 87189-1		AM BEUS		IRGC 87189		Cambodia	Cambodia	SEA	XI-adm	16.703
IRIS_313-10916	NA	SRAU SLAP::IRGC 23267-2		SRAU SLAP		IRGC 23267		Cambodia	Cambodia	SEA	GJ-tmp	16.6959
CX91	IRGC 135897	Govind					IRMBN	India	India	SAC	XI-1B	16.6819
IRIS_313-9449	IRGC 120996	JAMBALI::IRGC 73101-1		JAMBALI		IRGC 73101		Pakistan	Pakistan	SAW	cA (Aus)	16.6673
IRIS_313-10677	IRGC 128277	DEWAMINORI::IRGC 12743-1		DEWAMINORI		IRGC 12743		Japan	Japan	EAR	GJ-tmp	16.655
B196	NA	Taidongludao	Taitung Lu Dao		台东陆稻		MC	China	Taiwan	EAR	GJ-trp	16.6545
IRIS_313-11919	IRGC 127542	LAKHA KUAR::IRGC 74760-1		LAKHA KUAR		IRGC 74760		India	India	SAC	XI-2	16.6507
CX402	NA	TOG 6542					IRMBN	Africa	West Africa	WAF	admix	16.6367
IRIS_313-10937	IRGC 135788	PULUT WAJIT::IRGC 24624-3		PULUT WAJIT		IRGC 24624		Indonesia	Indonesia	SER	XI-3	16.617
IRIS_313-7850	IRGC 121985	BODA 148-3::GERVEX 8258-C1		BODA 148-3				Madagascar	Madagascar	IOC	GJ-trp	16.5942
IRIS_313-10912	IRGC 136185	NEANG SAATH K 45::IRGC 23109-2		NEANG SAATH K 45		IRGC 23109		Cambodia	Cambodia	SEA	XI-3	16.5821
CX148	IRGC 136050	Sri Raja					IRMBN	Malaysia	Malaysia	SER	XI-3	16.5766
B249	NA	Chaoyangyihao B	Chaoyang Yi Hao B		朝阳一号B		MC	China	China	EAS	XI-1A	16.5763
B032	IRGC 136034	Rohini					MC	India	India	SAC	XI-1B	16.572
IRIS_313-8167	IRGC 122303	DELTA::GERVEX 1519-C1		DELTA				France	France	EUR	GJ-adm	16.5664
IRIS_313-10519	IRGC 135733	ADT 22::IRGC 5901-3		ADT22		IRGC 5901		India	India	SAC	XI-2	16.5636
IRIS_313-9935	IRGC 126167	MEKENZIE SMALL::IRGC 49895-1		MEKENZIE SMALL		IRGC 49895		Guyana	Guyana	SAM	XI-2	16.5524
IRIS_313-12351	IRGC 135759	KHAO LOUANG::IRGC 107770-3		Khao louang		IRGC 107770		Lao People's Democratic Republic	Lao People's Democratic Republic	SEA	GJ-sbtrp	16.5425
IRIS_313-8123	IRGC 122175	MUGA::GERVEX 1099-C1		MUGA				Portugal	Portugal	EUR	GJ-tmp	16.5418
IRIS_313-8037	IRGC 122037	DORELLA::GERVEX 100-C1		DORELLA				Italy	Italy	EUR	GJ-adm	16.5405
B049	IRGC 136086	Zacaodao 13	Jhar Dhan 13		杂草稻13		MC	Nepal	Nepal	SAC	cA (Aus)	16.5157
IRIS_313-11602	IRGC 127597	MALCHI::IRGC 61004-1		MALCHI		IRGC 61004		India	India	SAC	cA (Aus)	16.5137
IRIS_313-10560	IRGC 127848	TA PAI MAUNG::IRGC 7292-1		TA-PAI-MAUNG		IRGC 7292		China	China	EAS	XI-1A	16.5095
IRIS_313-11949	IRGC 127568	LIU HE XI HE::IRGC 76661-1		LIU HE XI HE		IRGC 76661		China	China	EAS	XI-1A	16.5065
IRIS_313-11840	IRGC 132412	NIAW NAHK KRAD::IRGC 71352-1		NIAW NAHK KRAD		IRGC 71352		Thailand	Thailand	SEA	XI-3	16.5007
IRIS_313-11575	IRGC 127415	HONG PI NUO::IRGC 59638-1		HONG PI NUO		IRGC 59638		China	China	EAS	GJ-tmp	16.489
IRIS_313-8924	IRGC 125815	KUTTA::IRGC 52184-1		KUTTA		IRGC 52184		India	India	SAC	XI-2	16.4863
IRIS_313-10158	IRGC 126080	PICO NEGRO::IRGC 55849-1		PICO NEGRO		IRGC 55849		Ecuador	Ecuador	SAM	XI-adm	16.4592
IRIS_313-8985	IRGC 126153	KHAO' HAWM::IRGC 78257-1		KHAO' HAWM		IRGC 78257		Thailand	Thailand	SEA	XI-3	16.4577
IRIS_313-11950	IRGC 127626	MI GU::IRGC 76687-1		MI GU		IRGC 76687		China	China	EAS	XI-1A	16.4522
B266	NA	Haomake (K)	Hao Make (K)		毫马克(K)		MC	China	China	EAS	GJ-sbtrp	16.4466
IRIS_313-11887	IRGC 127434	IR 19058-107-1::IRGC 72997-1		IR 19058-107-1		IRGC 72997		Philippines	Philippines	SER-IRRI	XI-1B	16.4369
IRIS_313-9048	IRGC 125930	TSCHINANANGKA::IRGC 64935-1		TSCHINANANGKA		IRGC 64935		Bhutan	Bhutan	SAE	GJ-sbtrp	16.4316
IRIS_313-11281	IRGC 131967	ARC 15505::IRGC 42066-1		ARC 15505		IRGC 42066		India	India	SAC	XI-1A	16.4254
CX241	IRGC 135913	IAC 47					IRMBN	Philippines	Brazil	SAM	GJ-trp	16.4224
IRIS_313-9472	IRGC 125756	H 6::IRGC 157-1		H 6		IRGC 157		Sri Lanka	Sri Lanka	IOC	XI-adm	16.4026
IRIS_313-11658	IRGC 128381	MANYALOJOPOIHUN::IRGC 63350-1		MANYALOJOPOIHUN		IRGC 63350		Sierra Leone	Sierra Leone	WAF	GJ-trp	16.3939
IRIS_313-9464	IRGC 125903	SML ACORNI::IRGC 13389-1		SML ACORNI		IRGC 13389		Surinam	Surinam	SAM	admix	16.3935
CX123	NA	Yu Qiu Gu			鱼鳅谷		IRMBN	China	China	EAS	XI-1A	16.3895
IRIS_313-8177	IRGC 121971	AUGUSTO::GERVEX 1643-C1		AUGUSTO				Italy	Italy	EUR	GJ-adm	16.3787
IRIS_313-11870	IRGC 132429	NAN JING XIAO DAO::IRGC 72236-2		NAN JING XIAO DAO		IRGC 72236		China	China	EAS	XI-1A	16.3783
IRIS_313-12131	IRGC 132011	LG 944::IRGC 86000-1				IRGC 86000		Lao People's Democratic Republic	Lao People's Democratic Republic	SEA	XI-3	16.3769
CX139	IRGC 135826	Amareles					IRMBN	Portugal	Portugal	EUR	GJ-adm	16.364
IRIS_313-11582	IRGC 128499	WAN GENG BAI DAO TOU::IRGC 59948-1		WAN GENG BAI DAO TOU		IRGC 59948		China	China	EAS	GJ-tmp	16.3639
CX58	IRGC 135895	Giza 159					IRMBN	Egypt	Egypt	NAF	GJ-tmp	16.3557
IRIS_313-10774	IRGC 127404	HEGAR MANAH::IRGC 17733-1		HEGAR MANAH		IRGC 17733		Indonesia	Indonesia	SER	XI-adm	16.3512
IRIS_313-12190	IRGC 131975	CHAO KHAW NYAO::IRGC 89460-1		Chao khaw nyao		IRGC 89460		Lao People's Democratic Republic	Lao People's Democratic Republic	SEA	XI-adm	16.3437
B008	NA	Baxiang	Tam Huong		八香		MC	Vietnam	Viet Nam	SEA	GJ-tmp	16.3366
IRIS_313-8074	IRGC 122067	GOOLARAH::GERVEX 500-C1		GOOLARAH				Australia	Australia	OCE	GJ-trp	16.3289
IRIS_313-11160	IRGC 127195	B 38::IRGC 34409-1				IRGC 34409		Liberia	Liberia	WAF	XI-3	16.3255
IRIS_313-7685	IRGC 122089	IR 19746-28-2-2::IRGC 78072-C1		IR 19746-28-2-2		IRGC 78072		Philippines	Philippines	SER-IRRI	XI-1B	16.3171
IRIS_313-8085	IRGC 122016	CLOT::GERVEX 523-C1		CLOT				Spain	Spain	EUR	GJ-tmp	16.3011
IRIS_313-12045	NA	BUYAN::IRGC 81440-1		BUYAN		IRGC 81440		Indonesia	Indonesia	SER	GJ-trp	16.2982
IRIS_313-11630	IRGC 127737	POHHERLIMASION::IRGC 62025-1		POHHERLIMASION		IRGC 62025		Nepal	Nepal	SAC	cB (Bas)	16.298
IRIS_313-7650	IRGC 124380	BOTOHAVANA 139::GERVEX 8237-C1		BOTOHAVANA 139				Madagascar	Madagascar	IOC	XI-2	16.295
IRIS_313-8118	IRGC 122085	IBO 400::GERVEX 943-C1		IBO 400				Portugal	Portugal	EUR	GJ-tmp	16.2901
CX64	IRGC 135943	IRAT 352					IRMBN	Philippines	Brazil	SAM	XI-3	16.2896
IRIS_313-11370	IRGC 132368	SACHI::IRGC 46612-2		SACHI		IRGC 46612		India	India	SAC	XI-2	16.2894
IRIS_313-10728	IRGC 132261	OUSSANTHIABA::IRGC 16046-2		OUSSANTHIABA		IRGC 16046		Senegal	Senegal	WAF	XI-adm	16.2858
IRIS_313-10534	IRGC 127290	D 204-1::IRGC 6445-1		D 204-1		IRGC 6445		India	India	SAC	cA (Aus)	16.2835
B086	NA	Muguanuo	Mugua Nuo		木瓜糯		MC	China	China	EAS	admix	16.2815
IRIS_313-12134	IRGC 135802	THATENG::IRGC 86377-3		THATENG		IRGC 86377		Lao People's Democratic Republic	Lao People's Democratic Republic	SEA	GJ-sbtrp	16.2615
IRIS_313-11034	IRGC 127786	SANTHI 206::IRGC 28215-1		SANTHI 206		IRGC 28215		Pakistan	Pakistan	SAW	cA (Aus)	16.2534
IRIS_313-8381	IRGC 126308	PURAK SIRIBA::IRGC 71598-1		PURAK SIRIBA		IRGC 71598		Malaysia	Malaysia	SER	GJ-trp	16.2247
IRIS_313-10965	IRGC 127859	TILOKCHAN (SONABETHI)::IRGC 25927-1		TILOKCHAN(SONABETHI)		IRGC 25927		Bangladesh	Bangladesh	SAE	cA (Aus)	16.2217
IRIS_313-7688	IRGC 122091	IR 22::IRGC 11356-C1		IR 22		IRGC 11356		Philippines	Philippines	SER-IRRI	XI-1B	16.2082
IRIS_313-9117	IRGC 131931	BAJAR KUNING PAHIT::IRGC 17186-1		BAJAR KUNING PAHIT		IRGC 17186		Indonesia	Indonesia	SER	XI-3	16.2058
IRIS_313-12312	IRGC 128482	TA SENG::IRGC 99176-1		TA SENG		IRGC 99176		Lao People's Democratic Republic	Lao People's Democratic Republic	SEA	GJ-sbtrp	16.2011
IRIS_313-8658	IRGC 126195	CP 231::IRGC 34018-1		CP231		IRGC 34018		United States of America	United States of America	NAM	GJ-adm	16.1999
IRIS_313-8321	IRGC 120894	BHADOIA 303::IRGC 6588-1		BHADOIA 303		IRGC 6588		Bangladesh	Bangladesh	SAE	cA (Aus)	16.1971
IRIS_313-10980	IRGC 127344	DUDHSAR::IRGC 26458-1		DUDHSAR		IRGC 26458		Bangladesh	Bangladesh	SAE	admix	16.1945
CX153	IRGC 135951	Jalmagna					IRMBN	India	India	SAC	XI-2	16.1804
IRIS_313-7795	IRGC 124427	TSIPALA MENA 626::GERVEX 5392-C1		TSIPALA MENA 626				Madagascar	Madagascar	IOC	XI-2	16.1495
IRIS_313-10509	IRGC 127120	AMBARIKORI::IRGC 5132-1		AMBARIKORI		IRGC 5132		Africa	West Africa	WAF	XI-3	16.1432
CX329	IRGC 135956	Jinchuanyihao	Jinchuan Yi		津川一号		IRMBN	China	China	EAS	GJ-tmp	16.1428
IRIS_313-8627	IRGC 126260	PRELUDE::IRGC 1790-1		PRELUDE		IRGC 1790		United States of America	United States of America	NAM	GJ-trp	16.1406
IRIS_313-8665	IRGC 127058	M 7::IRGC 34281-1		M 7		IRGC 34281		United States of America	United States of America	NAM	GJ-tmp	16.1332
IRIS_313-11617	IRGC 128495	UPRH 33::IRGC 61505-1		UPRH33		IRGC 61505		India	India	SAC	cA (Aus)	16.1184
IRIS_313-11316	IRGC 135790	RANTAT::IRGC 43563-3		RANTAT		IRGC 43563		Indonesia	Indonesia	SER	XI-3	16.1161
CX59	IRGC 135983	Milagrosa, Zawa Banday	Milagrosa				IRMBN	Philippines	Philippines	SER-IRRI	cB (Bas)	16.1149
IRIS_313-11249	IRGC 132341	IR 4535-PP 23-6-8-1::IRGC 40402-2		IR 4535-PP 23-6-8-1		IRGC 40402		Philippines	Philippines	SER-IRRI	XI-adm	16.109
IRIS_313-12321	IRGC 127557	LG 10344::IRGC 99789-1				IRGC 99789		Lao People's Democratic Republic	Lao People's Democratic Republic	SEA	GJ-sbtrp	16.1089
IRIS_313-10816	IRGC 128164	SIDJERO GUNDIL::IRGC 18829-2		SIDJERO GUNDIL		IRGC 18829		Indonesia	Indonesia	SER	GJ-trp	16.1086
IRIS_313-11866	IRGC 127458	JIANG ER ZAO::IRGC 72152-1		JIANG ER ZAO		IRGC 72152		China	China	EAS	XI-1A	16.1066
B115	NA	Aimakang	Ai Makang		矮麻抗		MC	China	China	EAS	XI-1A	16.1033
IRIS_313-9228	IRGC 125764	HOKUSETSU::IRGC 65705-1		HOKUSETSU		IRGC 65705		Japan	Japan	EAR	GJ-tmp	16.1027
CX16	NA	Yuan jing 7	Yuan Jing 7				IRMBN	China	China	EAS	GJ-tmp	16.1007
IRIS_313-9324	IRGC 125702	CHIH SHEN LI::IRGC 1306-1		CHIH SHEN LI		IRGC 1306		China	China	EAS	XI-1A	16.0948
B043	IRGC 136081	YR 83-23-11					MC	Australia_	Australia	OCE	GJ-trp	16.0945
IRIS_313-9422	IRGC 120915	CHUNGUR BALI::IRGC 25855-1		CHUNGUR BALI		IRGC 25855		Bangladesh	Bangladesh	SAE	cA (Aus)	16.0899
IRIS_313-11443	IRGC 127161	ARC 18533::IRGC 51756-1		ARC 18533		IRGC 51756		India	India	SAC	XI-adm	16.0797
IRIS_313-11654	IRGC 128434	PL 3165::IRGC 62827-1		PL 3165		IRGC 62827		China	China	EAS	GJ-tmp	16.0752
IRIS_313-9523	IRGC 117569	RIKUTO KEMOCHI::IRGC 2719-1		RIKUTO KEMOCHI		IRGC 2719		Japan	Japan	EAR	GJ-adm	16.0588
IRIS_313-11350	IRGC 127983	BAJAL::IRGC 45024-2		BAJAL		IRGC 45024		India	India	SAC	cB (Bas)	16.0577
B124	NA	Geng 87-304			粳87-304		MC	China	China	EAS	GJ-tmp	16.0466
IRIS_313-10078	IRGC 125947	YOSHINO MOCHI::IRGC 74550-1		YOSHINO MOCHI		IRGC 74550		Japan	Japan	EAR	GJ-trp	16.038
IRIS_313-8641	IRGC 120876	AUS 439::IRGC 29221-1		AUS 439		IRGC 29221		Bangladesh	Bangladesh	SAE	cA (Aus)	16.0334
B031	IRGC 136007	Ngatsin					MC	India	India	SAC	XI-2	16.0334
IRIS_313-11618	IRGC 127879	UPRH 58::IRGC 61525-1		UPRH58		IRGC 61525		India	India	SAC	cA (Aus)	16.0318
B215	IRGC 135904	Hongqi 5			红旗5号		MC	China	China	EAS	GJ-tmp	16.0297
IRIS_313-11271	IRGC 127961	ARC 14737::IRGC 41729-2		ARC 14737		IRGC 41729		India	India	SAC	XI-2	16.0286
IRIS_313-8349	IRGC 128535	LATA MONA::IRGC 49333-1		LATA MONA		IRGC 49333		Bangladesh	Bangladesh	SAE	XI-2	16.0264
IRIS_313-12303	IRGC 127561	LG 9274::IRGC 98715-1				IRGC 98715		Lao People's Democratic Republic	Lao People's Democratic Republic	SEA	XI-adm	16.0188
IRIS_313-10827	IRGC 128242	BINARITOS::IRGC 19391-1		BINARITOS		IRGC 19391		Philippines	Philippines	SER	GJ-trp	16.0182
IRIS_313-10059	IRGC 125717	DACHEONGBYEO::IRGC 72533-1		DACHEONGBYEO		IRGC 72533		Korea, Republic of	Korea, Republic of	EAR	GJ-tmp	16.0071
CX94	IRGC 136051	Swarna					IRMBN	India	India	SAC	XI-adm	15.9966
IRIS_313-8332	IRGC 126298	ARC 15091::IRGC 43048-1		ARC 15091		IRGC 43048		India	India	SAC	XI-adm	15.9877
CX374	IRGC 136003	NERICA 9					IRMBN	Africa	Cote d'Ivoire	WAF	GJ-trp	15.9804
IRIS_313-12071	IRGC 128406	NIA::IRGC 82728-1		NIA		IRGC 82728		Lao People's Democratic Republic	Lao People's Democratic Republic	SEA	GJ-sbtrp	15.9763
IRIS_313-8064	IRGC 121948	32 UPLA::GERVEX 176-C1		32 UPLA				Argentina	Argentina	SAM	GJ-trp	15.9717
IRIS_313-10949	IRGC 127851	TEKALAK::IRGC 25154-1		TEKALAK		IRGC 25154		Indonesia	Indonesia	SER	GJ-trp	15.9695
CX65	IRGC 135884	Domsiah					IRMBN	Iran	Iran	WAS	cB (Bas)	15.9625
CX242	IRGC 135921	IR 47686-4-4-B-1					IRMBN	Philippines	Philippines	SER-IRRI	admix	15.9573
IRIS_313-10802	NA	PEUTEUJ::IRGC 18484-1		PEUTEUJ		IRGC 18484		Indonesia	Indonesia	SER	GJ-trp	15.9413
IRIS_313-11854	IRGC 127276	CHI GU::IRGC 71988-1		CHI GU		IRGC 71988		China	China	EAS	XI-1A	15.9394
CX100	IRGC 136020	Palung 2					IRMBN	Nepal	Nepal	SAC	XI-1B	15.9354
IRIS_313-11773	IRGC 132275	AUS 78-125::IRGC 69464-1		AUS 78-125		IRGC 69464		Gambia	Gambia	WAF	XI-3	15.932
IRIS_313-10477	IRGC 128454	RUSTY LATE::IRGC 3506-1		RUSTY LATE		IRGC 3506		China	China	EAS	XI-adm	15.9253
IRIS_313-11081	IRGC 128184	THAO LOUANG::IRGC 29688-2		THAO LOUANG		IRGC 29688		Lao People's Democratic Republic	Lao People's Democratic Republic	SEA	XI-3	15.9236
B064	NA	Xiangzaoxian 7	Xiang Zao Xian 7		湘早籼7号		MC	China	China	EAS	XI-adm	15.9162
IRIS_313-12305	IRGC 127708	PA KHENG KHAW::IRGC 98779-1		Pa kheng khaw		IRGC 98779		Lao People's Democratic Republic	Lao People's Democratic Republic	SEA	XI-3	15.9048
IRIS_313-12234	IRGC 127124	ANLINGWUBAILI::IRGC 93363-1		ANLINGWUBAILI		IRGC 93363		China	China	EAS	XI-1B	15.9038
IRIS_313-11286	IRGC 135736	ARC 18325::IRGC 42399-3		ARC 18325		IRGC 42399		India	India	SAC	XI-adm	15.8915
IRIS_313-9605	IRGC 125852	NCS 194::IRGC 51932-1		NCS194		IRGC 51932		India	India	SAC	XI-1A	15.8792
IRIS_313-10469	IRGC 128347	KINUGASAWASE::IRGC 2609-1		KINUGASAWASE		IRGC 2609		Japan	Japan	EAR	GJ-tmp	15.8682
IRIS_313-11049	IRGC 127179	AUS 219::IRGC 29031-1		AUS 219		IRGC 29031		Bangladesh	Bangladesh	SAE	cA (Aus)	15.8642
IRIS_313-12258	IRGC 128283	DON::IRGC 95117-1		Don		IRGC 95117		Lao People's Democratic Republic	Lao People's Democratic Republic	SEA	GJ-sbtrp	15.8623
IRIS_313-10515	IRGC 127836	TAICHUNG WOO GEN 2::IRGC 5525-1		TAICHUNG WOO-GEN 2		IRGC 5525		Taiwan	Taiwan	EAR	XI-1A	15.8613
IRIS_313-11297	IRGC 127947	ARC 13460::IRGC 42732-2		ARC 13460		IRGC 42732		India	India	SAC	admix	15.8568
CX156	IRGC 135995	MR 84	MR84				IRMBN	Malaysia	Malaysia	SER	XI-adm	15.8512
B252	NA	Xiangai B	Xian Gai B		献改B		MC	China	China	EAS	XI-adm	15.8498
IRIS_313-7866	IRGC 122018	CNA 7\BO\1\1>33-13-6-1::C1		CNA 7\BO\1\1>33-13-6-1				Colombia	Colombia	SAM	GJ-trp	15.8459
IRIS_313-10179	IRGC 125755	GUI HUA ZAO::IRGC 68060-1		GUI HUA ZAO		IRGC 68060		China	China	EAS	XI-adm	15.8421
CX83	IRGC 136074	X 22	X22				IRMBN	Vietnam	Viet Nam	SEA	XI-1B	15.84
IRIS_313-8571	IRGC 126204	ES 21::IRGC 56171-1		ES021(STRAW)		IRGC 56171		Tanzania	Tanzania	EAF	XI-3	15.8395
CX429	NA	shen-nong 1033					IRMBN		China	EAS	GJ-tmp	15.834
IRIS_313-11386	IRGC 128083	KHAO DAWK MALI TIA::IRGC 47773-2		KHAO DAWK MALI TIA		IRGC 47773		Thailand	Thailand	SEA	XI-3	15.8286
IRIS_313-8129	IRGC 122219	RODINA::GERVEX 1234-C1		RODINA				Bulgaria	Bulgaria	EUR	GJ-tmp	15.8271
IRIS_313-10883	IRGC 128224	ARC 12490::IRGC 22095-1		ARC 12490		IRGC 22095		India	India	SAC	admix	15.8092
CX345	NA	Yungeng 23	Yun Geng 23		云粳23号		IRMBN	China	China	EAS	GJ-tmp	15.8089
IRIS_313-11477	IRGC 127489	KANPURI::IRGC 53278-1		KANPURI		IRGC 53278		India	India	SAC	cA (Aus)	15.7911
IRIS_313-10786	NA	KETAN URANG::IRGC 17980-1		KETAN URANG		IRGC 17980		Indonesia	Indonesia	SER	XI-3	15.7876
IRIS_313-10891	IRGC 127148	ARC 12867::IRGC 22401-1		ARC 12867		IRGC 22401		India	India	SAC	cA (Aus)	15.7796
CX66	IRGC 136052	Tarom molaii					IRMBN	Iran	Iran	WAS	cB (Bas)	15.7788
CX265	IRGC 135988	MONOLAYA					IRMBN	United_States	Colombia	SAM	XI-adm	15.7706
IRIS_313-11226	IRGC 128153	SADAJIRA 19-258::IRGC 38293-2		SADAJIRA 19-258		IRGC 38293		Bangladesh	Bangladesh	SAE	XI-2	15.7696
IRIS_313-10995	IRGC 127976	ASE BAKKA LOMPO::IRGC 26988-2		ASE BAKKA LOMPO		IRGC 26988		Indonesia	Indonesia	SER	XI-3	15.7675
IRIS_313-8690	IRGC 117537	NEP HOA VANG::IRGC 40748-2		NEP HOA VANG		IRGC 40748		Viet Nam	Viet Nam	SEA	GJ-adm	15.7612
IRIS_313-10928	IRGC 128342	KHAO' SIM::IRGC 24094-1		KHAO' SIM		IRGC 24094		Thailand	Thailand	SEA	XI-3	15.7611
B152	NA	Zaoshunonghu 6	Zaoshu Nong Hu 6		早熟农虎6		MC	China	China	EAS	GJ-tmp	15.7579
IRIS_313-10988	IRGC 132422	CO 36::IRGC 26847-2		CO 36		IRGC 26847		India	India	SAC	XI-adm	15.7547
B053	IRGC 135819	80 A 97 YR 303-304-1-3					MC	Australia_	Australia	OCE	GJ-trp	15.7424
CX213	NA	Chennong 89366	Chen Nong 89366		沈农89366		IRMBN	China	China	EAS	GJ-tmp	15.7406
IRIS_313-10550	IRGC 135561	221 BC 4-1-45-10::IRGC 6865-1		221 BC4-1-45-10		IRGC 6865		Indonesia	Indonesia	SER	XI-adm	15.7328
IRIS_313-10681	IRGC 128338	KHAN THAI DO::IRGC 12990-1		Khan thai do		IRGC 12990		Lao People's Democratic Republic	Lao People's Democratic Republic	SEA	XI-3	15.7235
CX63	IRGC 135952	Jhona 349					IRMBN	India	India	SAC	cA (Aus)	15.7184
IRIS_313-12287	IRGC 127501	KAUK HNYINGWA::IRGC 97487-1		KAUK HNYINGWA		IRGC 97487		Myanmar	Myanmar	SEA	XI-3	15.7121
IRIS_313-8166	IRGC 121995	CALENDAL::GERVEX 1516-C1		CALENDAL				France	France	EUR	GJ-adm	15.7092
CX280	IRGC 135981	Maravilha					IRMBN	Brazil	Brazil	SAM	admix	15.7047
CX431	NA	Duoxi 1	Duo Xi 1		多系1号		IRMBN	China	China	EAS	XI-adm	15.7009
IRIS_313-10835	IRGC 127727	PERUNEL 0-69-18::IRGC 19581-1		PERUNEL 0-69-18		IRGC 19581		India	India	SAC	XI-2	15.6849
IRIS_313-11324	IRGC 127477	KALABOKRI::IRGC 43872-1		KALABOKRI		IRGC 43872		Bangladesh	Bangladesh	SAE	cA (Aus)	15.6784
CX287	NA	C52					IRMBN	China	China	EAS	GJ-tmp	15.6765
IRIS_313-10845	IRGC 132418	ARC 5756::IRGC 20220-2		ARC 5756		IRGC 20220		India	India	SAC	cA (Aus)	15.6647
IRIS_313-12307	IRGC 132034	POU::IRGC 98968-1		POU		IRGC 98968		Lao People's Democratic Republic	Lao People's Democratic Republic	SEA	GJ-sbtrp	15.6613
CX421	NA	BG147	Xa4+5+13 (BG147)		Xa4+5+13		IRMBN		Philippines	SER-IRRI	XI-1B	15.6512
IRIS_313-8115	IRGC 122046	FAMILIA 181::GERVEX 901-C1		FAMILIA 181				Portugal	Portugal	EUR	GJ-adm	15.6419
CX340	IRGC 135907	Hua 564			华564		IRMBN	China	China	EAS	XI-1B	15.6415
IRIS_313-10900	IRGC 132331	DAMNOEUB POR HING::IRGC 22841-2		DAMNOEUB POR HING		IRGC 22841		Cambodia	Cambodia	SEA	XI-3	15.6404
CX346	IRGC 136038	SAGC-4					IRMBN	China	China	EAS	XI-adm	15.6403
IRIS_313-11679	IRGC 127380	GASET BOW::IRGC 64316-1		GASET BOW		IRGC 64316		Thailand	Thailand	SEA	XI-3	15.638
IRIS_313-9944	IRGC 126312	SOLOMON RED RICE::IRGC 50950-1		SOLOMON RED RICE		IRGC 50950		Solomon Islands	Solomon Islands	OCE	XI-adm	15.6164
IRIS_313-10547	IRGC 128007	C 34-13::IRGC 6797-2		C 34-13		IRGC 6797		Myanmar	Myanmar	SEA	XI-adm	15.6107
IRIS_313-11032	IRGC 127710	PALAM PURI BAS 137::IRGC 28084-1		PALAM PURI BAS 137		IRGC 28084		Pakistan	Pakistan	SAW	cB (Bas)	15.5999
IRIS_313-10693	IRGC 132268	SEREH::IRGC 13732-2		SEREH		IRGC 13732		Indonesia	Indonesia	SER	GJ-trp	15.5984
B259	NA	Leihuozhan	Leihuo Zhan		雷火占		MC	China	China	EAS	XI-1A	15.5932
IRIS_313-10779	IRGC 128521	KERAN DUKUH::IRGC 17822-2		KERAN DUKUH		IRGC 17822		Indonesia	Indonesia	SER	XI-3	15.5905
CX387	IRGC 135812	1088					IRMBN	na	_no_info	na	XI-1B	15.5884
IRIS_313-11591	IRGC 132293	PULUT MERAH 2::IRGC 60427-1		PULUT MERAH 2		IRGC 60427		Malaysia	Malaysia	SER	admix	15.5626
IRIS_313-8909	IRGC 125740	FAYA MOSHI::IRGC 69653-1		FAYA MOSHI		IRGC 69653		Tanzania	Tanzania	EAF	XI-3	15.5568
IRIS_313-10810	IRGC 135793	SEGON BENGGALA::IRGC 18724-3		SEGON BENGGALA		IRGC 18724		Indonesia	Indonesia	SER	XI-3	15.552
IRIS_313-7797	IRGC 122272	UPL RI 7::IRTP 9897-C1		UPL RI 7				Philippines	Philippines	SER	XI-adm	15.5381
IRIS_313-11638	IRGC 127656	NCS 331::IRGC 62247-1		NCS331		IRGC 62247		India	India	SAC	XI-2	15.5379
IRIS_313-11472	NA	BANGBANG::IRGC 53131-1		BANGBANG		IRGC 53131		Philippines	Philippines	SER	XI-3	15.5371
IRIS_313-8687	IRGC 126329	KEREN FENHO::IRGC 56735-1		KEREN FENHO		IRGC 56735		Guinea-Bissau	Guinea-Bissau	WAF	GJ-trp	15.5357
CX341	IRGC 135908	Hua 565			华565		IRMBN	China	China	EAS	XI-adm	15.5263
IRIS_313-10990	IRGC 127206	BALIBUD::IRGC 26871-1		BALIBUD		IRGC 26871		Philippines	Philippines	SER	XI-adm	15.5218
IRIS_313-9320	IRGC 125901	SIPULUT HITAM PENDEK::IRGC 20154-1		SIPULUT HITAM PENDEK		IRGC 20154		Indonesia	Indonesia	SER	XI-3	15.5106
CX359	NA	Yunlu 103	Yun Lu 103		云陆103		IRMBN	China	China	EAS	GJ-trp	15.5024
B192	IRGC 136033	R 42					MC	Philippines	Philippines	SER-IRRI	admix	15.4949
IRIS_313-11321	IRGC 128043	GANDHISAIL::IRGC 43826-2		GANDHISAIL		IRGC 43826		Bangladesh	Bangladesh	SAE	XI-2	15.4923
IRIS_313-12289	IRGC 132304	YARSABA::IRGC 97567-1		YARSABA		IRGC 97567		Myanmar	Myanmar	SEA	GJ-sbtrp	15.4866
B150	NA	L 301B					MC	China	China	EAS	XI-1A	15.4852
IRIS_313-10723	IRGC 128111	MOND BA::IRGC 15813-2		MOND-BA		IRGC 15813		Senegal	Senegal	WAF	XI-2	15.4833
IRIS_313-10712	IRGC 128354	KOTO OURA S 5::IRGC 15155-1		KOTO OURA S 5		IRGC 15155		Cote d'Ivoire	Cote d'Ivoire	WAF	GJ-trp	15.4812
IRIS_313-12275	IRGC 127590	MAGU::IRGC 97027-1		MAGU		IRGC 97027		China	China	EAS	XI-adm	15.4777
CX14	NA	Chennong 265	Chen Nong 265		沈农 265		IRMBN	China	China	EAS	GJ-tmp	15.4751
B084	NA	Bawangbian 1	Ba Wang Bian 1		霸王鞭1		MC	China	China	EAS	admix	15.4725
IRIS_313-8208	IRGC 122152	LUSITO IRRADIADO 859-85-2::GERVEX 1676-C1		LUSITO IRRADIADO 859-85-2				Portugal	Portugal	EUR	GJ-tmp	15.4709
B222	NA	Beizinuo	Beizi Nuo		背子糯		MC	China	China	EAS	XI-1A	15.4705
IRIS_313-11916	IRGC 128395	MUDALIGA WEE::IRGC 74706-1		MUDALIGA WEE		IRGC 74706		Sri Lanka	Sri Lanka	IOC	XI-2	15.4684
IRIS_313-10688	IRGC 135782	PADI TIMBUN::IRGC 13451-3		PADI TIMBUN		IRGC 13451		Malaysia	Malaysia	SER	XI-3	15.4659
IRIS_313-12068	IRGC 132262	PULUT KETAN::IRGC 82674-2		PULUT KETAN		IRGC 82674		Indonesia	Indonesia	SER	GJ-trp	15.4609
IRIS_313-12097	IRGC 135778	NEANG MINH::IRGC 83897-3		NEANG MINH		IRGC 83897		Cambodia	Cambodia	SEA	XI-3	15.4552
IRIS_313-8140	IRGC 122241	SANGHAI::GERVEX 1264-C1		SANGHAI				China	China	EAS	GJ-tmp	15.4432
IRIS_313-9626	IRGC 121005	KALIA::IRGC 34699-1		KALIA		IRGC 34699		Bangladesh	Bangladesh	SAE	cA (Aus)	15.4366
IRIS_313-8204	IRGC 121817	S 102::GERVEX 1671-C1		S 102				United States of America	United States of America	NAM	GJ-tmp	15.4298
IRIS_313-8024	IRGC 122217	RIBE 253::GERVEX 54-C1		RIBE 253				Italy	Italy	EUR	GJ-tmp	15.4291
IRIS_313-8745	IRGC 126087	SD 120 SELN (CI 12320)::IRGC 1667-1		SD120 SELN (CI 12320)		IRGC 1667		Haiti	Haiti	CAM	GJ-trp	15.419
IRIS_313-11515	IRGC 127231	BKN BR 1031-78-5-4::IRGC 55927-1		BKN-BR-1031-78-5-4		IRGC 55927			Thailand	SEA	XI-adm	15.4147
IRIS_313-10654	IRGC 128335	KA SAEN::IRGC 11642-1		Ka saen		IRGC 11642		Lao People's Democratic Republic	Lao People's Democratic Republic	SEA	XI-3	15.4109
IRIS_313-10623	IRGC 127804	SIDALI::IRGC 9567-1		SIDALI		IRGC 9567		Nepal	Nepal	SAC	cA (Aus)	15.4093
CX129	IRGC 135986	MOLOK					IRMBN	Indonesia	Indonesia	SER	GJ-trp	15.4049
B056	NA	Tieganwu	Tie Gan Wu		铁秆乌		MC	China	China	EAS	GJ-tmp	15.4042
IRIS_313-8982	IRGC 125655	ARC 18112::IRGC 42274-1		ARC 18112		IRGC 42274		India	India	SAC	XI-adm	15.4014
CX45	IRGC 135877	Dhan 4					IRMBN	India	India	SAC	XI-1B	15.3985
IRIS_313-11836	IRGC 132000	KHAO KO RAOH::IRGC 71208-1		KHAO KO RAOH		IRGC 71208		Thailand	Thailand	SEA	XI-3	15.3971
B051	IRGC 135899	GZ 1368-5-4					MC	Egypt_	Egypt	NAF	XI-adm	15.3938
IRIS_313-12259	IRGC 127352	EA NOUAN::IRGC 95147-1		Ea nouan		IRGC 95147		Lao People's Democratic Republic	Lao People's Democratic Republic	SEA	XI-3	15.3868
IRIS_313-7816	IRGC 122288	WAS 199-B-1-2-1::C1		WAS 199-B-1-2-1				Senegal	Senegal	WAF	XI-1B	15.3846
IRIS_313-10822	IRGC 128199	UNGGAS::IRGC 19176-2		UNGGAS		IRGC 19176		Indonesia	Indonesia	SER	XI-3	15.3828
B140	NA	Pei C122			培C122		MC	China	China	EAS	XI-1A	15.3758
IRIS_313-10332	IRGC 126044	B 4414 F-MR-6-3::IRGC 117310-1		B 4414 F-MR-6-3		IRGC 117310		Indonesia	Indonesia	SER	XI-adm	15.3731
B103	NA	Laohongdao	Lao Hong Dao		老红稻		MC	China	China	EAS	GJ-tmp	15.3687
IRIS_313-10675	IRGC 127132	ARC 10905::IRGC 12669-1		ARC 10905		IRGC 12669		India	India	SAC	XI-adm	15.3632
IRIS_313-10394	IRGC 125986	IR 80310-12-B-1-3-B::IRGC 117307-1		IR 80310-12-B-1-3-B		IRGC 117307		Philippines	Philippines	SER-IRRI	XI-adm	15.3578
IRIS_313-11513	IRGC 127269	CHATO::IRGC 55825-1		CHATO		IRGC 55825		Ecuador	Ecuador	SAM	XI-1B	15.356
IRIS_313-11005	IRGC 128140	PULU LOTONG::IRGC 27380-2		PULU LOTONG		IRGC 27380		Indonesia	Indonesia	SER	GJ-trp	15.3344
B131	NA	Aizizhan	Ai Zi Zhan		矮仔占		MC	China	China	EAS	XI-adm	15.3273
B205	NA	Cunsanli	Cun San Li		寸三粒		MC	China	China	EAS	GJ-adm	15.3254
IRIS_313-10922	IRGC 132264	R 258::IRGC 23702-2		R 258		IRGC 23702		Lao People's Democratic Republic	Lao People's Democratic Republic	SEA	GJ-sbtrp	15.325
IRIS_313-9131	IRGC 135749	DOC PHUNG D 12::IRGC 10234-2		DOC PHUNG D 12		IRGC 10234		Viet Nam	Viet Nam	SEA	XI-3	15.3157
IRIS_313-11221	IRGC 128022	CYLINDRICAL 30-605::IRGC 37845-2		CYLINDRICAL 30-605		IRGC 37845		Bangladesh	Bangladesh	SAE	XI-2	15.3104
B130	NA	Wanlixian	Wanli Xian		万利籼		MC	China	China	EAS	XI-1A	15.3042
IRIS_313-12265	IRGC 128352	KON SIM::IRGC 95626-1		Kon Sim		IRGC 95626		Lao People's Democratic Republic	Lao People's Democratic Republic	SEA	GJ-sbtrp	15.3011
CX144	IRGC 135906	Hta 7204	Hta7204				IRMBN	na	Thailand	SEA	XI-adm	15.2992
IRIS_313-11897	IRGC 128431	PHIT CHZK::IRGC 73317-1		PHIT CHZK		IRGC 73317		Thailand	Thailand	SEA	GJ-sbtrp	15.2977
IRIS_313-12354	IRGC 127649	NASAENG::IRGC 107818-1		Nasaeng		IRGC 107818		Lao People's Democratic Republic	Lao People's Democratic Republic	SEA	XI-adm	15.2838
IRIS_313-7799	IRGC 124428	VARY LAVA DE MAROVATO::GERVEX 8396-C1		VARY LAVA DE MAROVATO				Madagascar	Madagascar	IOC	XI-2	15.283
IRIS_313-10984	IRGC 128034	DUDHSAR::IRGC 26609-2		DUDHSAR		IRGC 26609		Bangladesh	Bangladesh	SAE	XI-2	15.2779
IRIS_313-10423	IRGC 121160	YN 1353-3::IRGC 117363-1		YN 1353-3		IRGC 117363		Myanmar	Myanmar	SEA	XI-adm	15.2704
IRIS_313-10961	IRGC 136187	TARING PELUNDUK::IRGC 25821-2		TARING PELUNDUK		IRGC 25821		Indonesia	Indonesia	SER	XI-3	15.2703
IRIS_313-11059	IRGC 127189	AUS 344::IRGC 29131-1		AUS 344		IRGC 29131		Bangladesh	Bangladesh	SAE	cA (Aus)	15.2682
B109	NA	Lengshuigu 2	Leng Shuigu 2		冷水谷2		MC	China	China	EAS	GJ-adm	15.2569
IRIS_313-11431	IRGC 127244	C 166-135::IRGC 50633-1		C 166-135		IRGC 50633		Philippines	Philippines	SER	XI-3	15.2561
IRIS_313-11909	IRGC 127414	HONG MI JIU GONG JI::IRGC 74031-1		HONG MI JIU GONG JI		IRGC 74031		China	China	EAS	XI-1A	15.249
B002	IRGC 136041	Sansuijin	San Sui Jin		三穗锦		MC	China	China	EAS	GJ-tmp	15.2473
IRIS_313-10327	IRGC 127042	CAROLINO BLANCO::IRGC 117249-1		CAROLINO BLANCO		IRGC 117249		Peru	Peru	SAM	GJ-trp	15.2443
IRIS_313-10930	IRGC 127714	PANKHIRAJ::IRGC 24139-1		PANKHIRAJ		IRGC 24139		Bangladesh	Bangladesh	SAE	cA (Aus)	15.2433
B105	NA	Baoxuan 21	Bao Xuan 21		包选21号		MC	China	China	EAS	XI-adm	15.2235
IRIS_313-9963	NA	WIR 1391::IRGC 51605-1		WIR1391		IRGC 51605		Sri Lanka	Sri Lanka	IOC	cA (Aus)	15.2123
B228	NA	Haobayong 1	Hao Ba Yong 1		毫巴永1		MC	China	China	EAS	GJ-adm	15.211
IRIS_313-9936	IRGC 126143	SITHAIYAN KOTTAI SAMBA::IRGC 50155-1		SITHAIYAN KOTTAI SAMBA		IRGC 50155		Sri Lanka	Sri Lanka	IOC	XI-2	15.206
IRIS_313-12350	IRGC 127593	MAK KHEUA KANG::IRGC 107712-1		MAK KHEUA KANG		IRGC 107712		Lao People's Democratic Republic	Lao People's Democratic Republic	SEA	GJ-sbtrp	15.199
IRIS_313-10805	IRGC 127746	PULO::IRGC 18519-1		PULO		IRGC 18519		Indonesia	Indonesia	SER	GJ-trp	15.1898
CX211	NA	M 3122					IRMBN	China	China	EAS	GJ-tmp	15.1873
IRIS_313-11767	IRGC 128496	VARY LAVA DE BOLOGNE::IRGC 69101-1		VARY LAVA DE BOLOGNE		IRGC 69101		Madagascar	Madagascar	IOC	admix	15.1778
IRIS_313-11596	IRGC 127221	BHAINSA MUNDARIYA::IRGC 60893-1		BHAINSA MUNDARIYA		IRGC 60893		India	India	SAC	XI-adm	15.1762
IRIS_313-11966	IRGC 127752	QI GU::IRGC 77381-1		QI GU		IRGC 77381		China	China	EAS	XI-1A	15.1742
IRIS_313-10703	IRGC 128418	PADI ADONG DUMARAT::IRGC 14356-1		PADI ADONG DUMARAT		IRGC 14356		Malaysia	Malaysia	SER	GJ-trp	15.1741
IRIS_313-9469	IRGC 125929	TSAO SHENG LI 1::IRGC 1309-1		TSAO SHENG LI 1		IRGC 1309		China	China	EAS	XI-1A	15.1697
IRIS_313-12262	IRGC 128410	NYAE::IRGC 95302-1		Nyae		IRGC 95302		Lao People's Democratic Republic	Lao People's Democratic Republic	SEA	GJ-sbtrp	15.1693
IRIS_313-12144	IRGC 136099	GINAYANGGANG::IRGC 87131-1		GINAYANGGANG		IRGC 87131		Philippines	Philippines	SER	GJ-trp	15.1685
IRIS_313-10710	IRGC 128135	PINDE GOGO WIERIE::IRGC 14795-2		PINDE GOGO WIERIE		IRGC 14795		Surinam	Surinam	SAM	GJ-trp	15.1623
IRIS_313-9594	IRGC 126131	ASHI BINNI::IRGC 77216-1		ASHI BINNI		IRGC 77216		Bangladesh	Bangladesh	SAE	XI-adm	15.1612
IRIS_313-11940	IRGC 127599	MALOBA (DISSI ROUGE)::IRGC 75700-1		MALOBA(DISSI ROUGE)		IRGC 75700		Burkina Faso	Burkina Faso	WAF	XI-adm	15.152
IRIS_313-10260	IRGC 125957	CEA 3::IRGC 116965-1		CEA 3		IRGC 116965		Paraguay	Paraguay	SAM	XI-adm	15.1489
CX236	IRGC 136064	Vandana					IRMBN	na	India	SAC	XI-adm	15.1488
IRIS_313-12291	IRGC 132358	NGA CHEKH FAT::IRGC 97701-2		NGA CHEKH FAT		IRGC 97701		Myanmar	Myanmar	SEA	XI-adm	15.1404
IRIS_313-10806	IRGC 135789	RADEN DJAWA (GUNDIL)::IRGC 18558-3		RADEN DJAWA(GUNDIL)		IRGC 18558		Indonesia	Indonesia	SER	XI-3	15.1378
IRIS_313-8660	IRGC 125616	KOTTEYARAN::IRGC 47383-1		KOTTEYARAN		IRGC 47383		Sri Lanka	Sri Lanka	IOC	XI-2	15.136
B121	NA	Luke 3	Lu Ke 3		泸科3号		MC	China	China	EAS	XI-1A	15.1323
IRIS_313-10789	IRGC 132009	LENGGANG GENUK BULU::IRGC 18119-1		LENGGANG GENUK BULU		IRGC 18119		Indonesia	Indonesia	SER	GJ-trp	15.1212
IRIS_313-11567	IRGC 127766	RATO BASMATI::IRGC 59205-1		RATO BASMATI		IRGC 59205		Nepal	Nepal	SAC	cB (Bas)	15.1134
IRIS_313-11543	IRGC 127537	KYUN TAW SEIN::IRGC 58072-1		KYUN TAW SEIN		IRGC 58072		Myanmar	Myanmar	SEA	XI-3	15.1095
IRIS_313-8185	IRGC 122061	GLADIO::GERVEX 1652-C1		GLADIO				Italy	Italy	EUR	GJ-trp	15.0963
IRIS_313-10518	IRGC 128088	KHAYANGYA D 34-181::IRGC 5861-2		KHAYANGYA D 34-181		IRGC 5861		Myanmar	Myanmar	SEA	XI-adm	15.0944
CX146	IRGC 135871	CO 43					IRMBN	India	India	SAC	XI-adm	15.0868
IRIS_313-11988	IRGC 132033	POTOQOIN::IRGC 78677-1		POTOQOIN		IRGC 78677		Sierra Leone	Sierra Leone	WAF	XI-adm	15.0838
IRIS_313-10221	IRGC 125663	BA BAI GU::IRGC 79580-1		BA BAI GU		IRGC 79580		China	China	EAS	XI-adm	15.0837
IRIS_313-11989	IRGC 132416	TAMBAS JANGKOK::IRGC 78724-1		TAMBAS JANGKOK		IRGC 78724		Brunei Darussalam	Brunei Darussalam	SER	XI-3	15.0787
IRIS_313-12141	IRGC 132399	HATEA::IRGC 86973-1		HATEA		IRGC 86973		Bangladesh	Bangladesh	SAE	cA (Aus)	15.0762
CX25	IRGC 135867	Cisanggarung	Cisang garung				IRMBN	Indonesia	Indonesia	SER	XI-1B	15.0699
B068	NA	Gaoyangdiandao dahongmang	Gaoyang Dian Dao Dahong Mang		高阳淀稻大红芒		MC	China	China	EAS	GJ-tmp	15.0689
IRIS_313-11358	IRGC 128023	DADKHANI::IRGC 45454-2		DADKHANI		IRGC 45454		India	India	SAC	XI-2	15.0688
IRIS_313-11941	IRGC 128394	MOUI SAMBA::IRGC 75751-1		MOUI SAMBA		IRGC 75751		Burkina Faso	Burkina Faso	WAF	XI-1B	15.0619
IRIS_313-10888	IRGC 127943	ARC 12726::IRGC 22288-2		ARC 12726		IRGC 22288		India	India	SAC	GJ-sbtrp	15.0531
IRIS_313-9406	NA	LEUANG SAWED::IRGC 78268-1		LEUANG SAWED		IRGC 78268		Thailand	Thailand	SEA	XI-3	15.044
IRIS_313-9996	IRGC 126990	SUWEON 295::IRGC 58368-1		SUWEON 295		IRGC 58368		Korea, Republic of	Korea, Republic of	EAR	GJ-tmp	15.0405
IRIS_313-11007	IRGC 128141	PULUT BONGO::IRGC 27397-2		PULUT BONGO		IRGC 27397		Indonesia	Indonesia	SER	GJ-trp	15.036
CX369	IRGC 135947	IRBB 62					IRMBN	Philippines	Philippines	SER-IRRI	XI-1B	15.034
CX390	NA	Yuelianggu	Yueliang Gu		月亮谷		IRMBN	China	China	EAS	XI-adm	15.0328
IRIS_313-11521	IRGC 127847	TAN NONG::IRGC 56126-1		TAN NONG		IRGC 56126		Viet Nam	Viet Nam	SEA	XI-adm	15.0299
IRIS_313-10228	IRGC 125758	HAN NUO::IRGC 82350-1		HAN NUO		IRGC 82350		China	China	EAS	GJ-tmp	15.0238
B021	IRGC 136044	Seln 244A6-20					MC	Australia_	Australia	OCE	XI-adm	15.0202
B024	IRGC 136076	Xianluosichi	Kularb Deang		暹罗斯赤		MC	Thailand	Thailand	SEA	XI-1A	15.0184
IRIS_313-8200	IRGC 122183	OPALE::GERVEX 1667-C1		OPALE				Italy	Italy	EUR	GJ-tmp	15.0163
IRIS_313-11927	IRGC 127897	YAH TOW::IRGC 75191-1		YAH TOW		IRGC 75191		Thailand	Thailand	SEA	XI-3	15.0111
IRIS_313-12128	IRGC 127408	HMA GNENG::IRGC 85751-1		Hma gneng		IRGC 85751		Lao People's Democratic Republic	Lao People's Democratic Republic	SEA	XI-3	15.0097

## Sheet: Table S5
Table S5. Selected BLASTN result of three Translocations and Translocation genotype result of IRRI2K_86 and IRRI2K_91
TranslocationID	Identity	Chromosome	Posiiton	IRRI2K_86	IRRI2K_91
Chr11_21534691-21541116:+	100	Chr11	21534691	Absence	Presence
Chr11_21534691-21541116:+	100	Chr11	21541116	Absence	Presence
Chr11_21534691-21541116:+	96.267	Chr5	8080588	Presence	Absence
Chr11_21534691-21541116:+	96.267	Chr5	8074149	Presence	Absence
Chr9_7446492-7450923:+	100	Chr9	7446492	Presence	Absence
Chr9_7446492-7450923:+	100	Chr9	7450923	Presence	Absence
Chr9_7446492-7450923:+	99.594	Chr8	4791977	Absence	Presence
Chr9_7446492-7450923:+	99.594	Chr8	4796407	Absence	Presence
Chr3_11340253-11348034:+	100	Chr3	11340253	Absence	Presence
Chr3_11340253-11348034:+	100	Chr3	11348034	Absence	Presence
Chr3_11340253-11348034:+	98.706	Chr9	2460193	Presence	Absence
Chr3_11340253-11348034:+	98.706	Chr9	2452430	Presence	Absence

## Sheet: Table S6
Table S6. MUMmer result by comparing the genomes of accession IRRI2K_86 with the pangenome for translocations
Segment on the pangenome		Segment on IRRI2K_86		Length 1	Length 2	Identity	Chromosome on the pangenome	Chromosome on IRRI2K_86	Translocation
21508554	21534691	19349680	19375935	26138	26256	98.33	Chr11	chr11_RaGOO	Chr11:21534691-21541116
21541116	21551866	19375935	19386642	10751	10708	97	Chr11	chr11_RaGOO	Chr11:21534691-21541116
8052398	8082403	7316747	7346710	30006	29964	99.34	Chr5	chr05_RaGOO	Chr5:8080588-8074149
7440293	7454656	6500337	6514716	14364	14380	98.15	Chr9	chr09_RaGOO	Chr9:7446492-7450923
4785434	4791976	4176541	4183091	6543	6551	99.44	Chr8	chr08_RaGOO	Chr8:4791977-4796407
4796408	4800527	4183091	4187208	4120	4118	98.48	Chr8	chr08_RaGOO	Chr8:4791977-4796407
11332492	11340251	11015133	11022848	7760	7716	98.57	Chr3	chr03_RaGOO	Chr3:11340253-11348034
11348031	11351788	11022847	11026584	3758	3738	96.24	Chr3	chr03_RaGOO	Chr3:11340253-11348034
2422221	2480255	1996390	2054522	58035	58133	98.46	Chr9	chr09_RaGOO	Chr9:2460193-2452430

## Sheet: Table S7
Table S7. MUMmer result by comparing the genomes of accession IRRI2K_91 with the pangenome for translocations
Segment on the pangenome		Segment on IRRI2K_91		Length 1	Length 2	Identity	Chromosome on the pangenome	Chromosome on IRRI2K_91	Translocation
21522710	21551866	20434728	20463863	29157	29136	98.04	Chr11	chr11_RaGOO	Chr11:21534691-21541116
8061358	8074148	7131997	7144687	12791	12691	97.49	Chr5	chr05_RaGOO	Chr5:8080588-8074149
8080589	8085099	7144687	7149179	4511	4493	97.72	Chr5	chr05_RaGOO	Chr5:8080588-8074149
7440293	7446496	6146885	6153138	6204	6254	95.85	Chr9	chr09_RaGOO	Chr9:7446492-7450923
7450923	7454844	6153134	6157054	3922	3921	99.75	Chr9	chr09_RaGOO	Chr9:7446492-7450923
4785468	4800527	4076826	4091896	15060	15071	99.25	Chr8	chr08_RaGOO	Chr8:4791977-4796407
11316456	11351788	10947447	10982778	35333	35332	98.74	Chr3	chr03_RaGOO	Chr3:11340253-11348034
2422221	2452431	1886213	1916432	30211	30220	98.54	Chr9	chr09_RaGOO	Chr9:2460193-2452430
2460197	2461271	1916432	1917508	1075	1077	98.61	Chr9	chr09_RaGOO	Chr9:2460193-2452430

## Sheet: Table S8
Table S8. Selected inversion genotype result of IRRI2K_86 and IRRI2K_91
Chr	breakpoint position	IRRI2K_86	IRRI2K_91	Inversion on pangenome	Length
Chr5	13924048	C	A	Chr5:13924048-13925592	1544
Chr5	13925592	C	A	Chr5:13924048-13925592	1544
Chr8	30169876	C	A	Chr8:30169876-30171057	1181
Chr8	30171057	C	A	Chr8:30169876-30171057	1181
Chr1	7980633	A	C	Chr1:7980633-7982430	1797
Chr1	7982430	A	C	Chr1:7980633-7982430	1797
Note: "A" meant the accession didn't have reads spanning the breakpoint, "C" meant the accession had reads spanning the breakpoint.

## Sheet: Table S9
Table S9. MUMmer result by comparing the genomes of accession IRRI2K_86 with the pangenome for inversions
Segment on the pangenome		Segment on IRRI2K_86		Length 1	Length 2	Identity	Chromosome on the pangenome	Chromosome on IRRI2K_86	Inversion
13902408	13980631	12329090	12407319	78224	78230	99.95	Chr5	chr05_RaGOO	Chr5:13924048-13925592
30159534	30185065	25607362	25632908	25532	25547	99.88	Chr8	chr08_RaGOO	Chr8:30169876-30171057
7980633	7982430	7094543	7092723	1798	1821	97.58	Chr1	chr01_RaGOO	Chr1:7980633-7982430

## Sheet: Table S10
Table S10. MUMmer result by comparing the genomes of accession IRRI2K_91 with the pangenome for inversions
Segment on the pangenome		Segment on IRRI2K_91		Length 1	Length 2	Identity	Chromosome on the pangenome	Chromosome on IRRI2K_86	Inversion
13924048	13925592	12393001	12391459	1545	1543	98.83	Chr5	chr05_RaGOO	Chr5:13924048-13925592
30169876	30171057	24694620	24693439	1182	1182	98.82	Chr8	chr08_RaGOO	Chr8:30169876-30171057
7973823	7981957	7052000	7060142	8135	8143	97.42	Chr1	chr01_RaGOO	Chr1:7980633-7982430

[truncated: 15 more sheets: Table S11, Table S12, Table S13, Table S14, Table S15, Table S16, Table 17, Table S18, Table S19, Table S20, Table S21, Table S22, Table S23, Table S24, Table S25]
